1 **Genomic insights and temperature-dependent transcriptional**  
2 **responses of *Kosmotoga olearia*, a deep-biosphere bacterium that can**  
3 **grow from 20°C to 79°C**

4 **Stephen M. J. Pollo<sup>1</sup>, Abigail A. Adebusuyi<sup>1#</sup>, Timothy J. Straub<sup>2</sup>, Julia M. Foght<sup>1</sup>, Olga**  
5 **Zhaxybayeva<sup>2,3</sup> and Camilla L. Nesbø<sup>1,4\*</sup>**

6 <sup>1</sup>Department of Biological Sciences, University of Alberta, Edmonton, Alberta, Canada

7 <sup>2</sup>Department of Biological Sciences, Dartmouth College, Hanover, NH, USA

8 <sup>3</sup>Department of Computer Science, Dartmouth College, Hanover, NH, USA

9 <sup>4</sup>Centre for Ecological and Evolutionary Synthesis, Department of Biology, University of Oslo, Oslo,  
10 Norway

11 **\* Correspondence:**  
12 Corresponding Author  
13 nesbo@ualberta.ca

14 **#Current address:** Centre for Research & Innovation, Grande Prairie Regional College, Grande  
15 Prairie, AB

16

17 **Keywords: Thermotogae, RNA-Seq, lateral gene transfer, temperature response, cold response,**  
18 **thermal adaptation**

19 Word count for the text: 8755 words

20 4 Figures

21

## Temperature responses in *Kosmotoga olearia*

### 22 Abstract

23 Temperature is one of the defining parameters of an ecological niche, and ambient temperature  
24 change is a physiological challenge faced by all living cells. Most organisms are adapted to growing  
25 within a temperature range that rarely exceeds  $\sim 30^{\circ}\text{C}$ , but the anaerobic thermophilic deep  
26 subsurface bacterium *Kosmotoga olearia* is capable of growing over an extremely wide temperature  
27 range ( $20^{\circ}\text{C} - 79^{\circ}\text{C}$ ). To identify genes with expression patterns correlated with this flexible  
28 phenotype, we compared transcriptomes of *K. olearia* cultures grown at its optimal  $65^{\circ}\text{C}$  to those at  
29  $30^{\circ}\text{C}$ ,  $40^{\circ}\text{C}$ , and  $77^{\circ}\text{C}$ . In addition to expected differences in growth rate we found that the  
30 temperature treatments significantly affected expression of 573 of 2,224 *K. olearia*'s genes. At  
31 different temperatures *K. olearia* remodels its metabolism dramatically, with increased expression of  
32 genes involved in energy and carbohydrate metabolism at high temperatures and up-regulation of  
33 amino acid metabolism at lower temperatures. At sub-optimal temperatures, many transcriptional  
34 changes were similar to those observed in mesophilic bacteria at physiologically low temperatures,  
35 including up-regulation of genes encoding enzymes for fatty acid synthesis, typical cold stress genes  
36 and ribosomal proteins. In comparison to other Thermotogae, *K. olearia* has multiple copies of some  
37 cold-associated genes, consistent with observations that increase in gene copy number is a strategy  
38 for adaptation to low temperature environments. Many of these cold response genes are predicted to  
39 have been laterally acquired and, particularly among the transferred genes shared with *Mesotoga*, a  
40 larger portion are up-regulated at low temperatures, suggesting that gene exchange plays a role in  
41 bacterial thermoadaptation. Notably, at  $77^{\circ}\text{C}$  one-third of the up-regulated genes encode proteins  
42 with hypothetical functions, indicating that many features of response to high temperature and stress  
43 may still be unknown. Our finding of coordinated temperature-specific gene expression patterns, and  
44 by extension temperature specific metabolism, suggests that *Kosmotoga* populations encounter  
45 variable environments, probably through migration. Therefore, we conjecture that deep subsurface  
46 microbial communities are more dynamic than currently perceived.

47

## Temperature responses in *Kosmotoga olearia*

### 48 1 Introduction

49 Microorganisms are capable of growing over an impressive temperature range, at least from -15°C to  
50 122°C (Takai et al., 2008; Mykytczuk et al., 2013), and temperature is one of the most important  
51 physical factors determining their distribution, diversity, and abundance (Schumann, 2009).  
52 However, individual microbial species grow only within a much narrower temperature interval. For  
53 example, *Escherichia coli* O157:H7 thrives in the laboratory between 19°C and 41°C (Raghuber and  
54 Matches, 1990), while *Geobacillus thermoleovorans* has a growth range of 37°C to 70°C (Dinsdale et  
55 al., 2011). Microorganisms with temperature ranges >50°C are rare and, to date, research into the few  
56 having ranges >40°C has focused on psychrophiles (e.g., (Mykytczuk et al., 2013)). *Kosmotoga*  
57 *olearia* TBF 19.5.1 (hereafter referred to as *K. olearia*) is an anaerobic thermophile from the bacterial  
58 phylum Thermotogae with a growth range that spans almost 60°C (DiPippo et al., 2009). How does  
59 this organism achieve such physiological flexibility and what are the evolutionary advantages and  
60 implications of this capability?

61 Fluctuations in temperature induce broad physiological changes in cells, including growth  
62 rate, alterations to cell wall and membrane composition, translation, and energy metabolism (Barria  
63 et al., 2013; Pollo et al., 2015; Schumann, 2009). These physiological changes can be classified into  
64 two broad types of cellular response. Cold or heat *shock* designates the changes observed  
65 *immediately* after the shift of a culture to a lower or higher temperature, while *prolonged growth* at a  
66 specific lower or higher temperature elicits an *acclimated* low- or high-temperature response (Barria  
67 et al., 2013; Schumann, 2009). Most studies of prokaryotes have focused on temperature shock  
68 responses rather than acclimated growth. Among the Thermotogae, responses to both heat shock and  
69 prolonged growth at high temperatures have been studied in the hyperthermophile *Thermotoga*  
70 *maritima*, which can grow between 55°C and 90°C (Pysz et al., 2004; Wang et al., 2012). During  
71 prolonged high temperature growth *T. maritima* strongly up-regulates central carbohydrate  
72 metabolism genes and expresses a few typical heat shock protein genes (Wang et al., 2012). Little is  
73 known about how *T. maritima* responds to sub-optimal temperatures, although it encodes some genes  
74 implicated in cold shock response. For example, its family of cold shock proteins (Csp), which are  
75 nucleic acid chaperones known to be induced during cold shock and cold acclimation in mesophilic  
76 bacteria (Barria et al., 2013; Phadtare, 2004), exhibits nucleic acid melting activity at physiologically  
77 low temperatures (Phadtare et al., 2003). Similarly, responses to cold shock in a few other  
78 thermophiles involve many of the genes implicated in mesophilic cold shock response (e.g.,  
79 (Boonyaratanakornkit et al., 2005; Mega et al., 2010)). In this study we systematically assessed  
80 bacterial physiological changes associated with response to prolonged growth at both high and low  
81 temperature using *K. olearia* as a model system. Such changes can reflect not only response to  
82 temperature itself, but also growth rate effects and general responses to stress. By conflating these  
83 factors, our study examined overall changes in *K. olearia*'s gene expression in the environments  
84 defined by a specific temperature.

85 The *K. olearia* genome (NC\_012785) has 2,302,126 bp and is predicted to encode 2,224  
86 genes (Swithers et al., 2011). Within the Thermotogae, genome size, intergenic region size, and  
87 number of predicted coding regions correlate with the optimal growth temperature of an isolate  
88 (Zhaxybayeva et al., 2012), with hyperthermophilic Thermotogae genomes being the most compact.  
89 Phylogenetically, the Thermotogae order Kosmotogales comprises the genera *Kosmotoga* and  
90 *Mesotoga* spp., the latter being the only described mesophilic Thermotogae lineage (Pollo et al.,  
91 2015). Assuming a hyperthermophilic last common ancestor of the Thermotogae (Zhaxybayeva et  
92 al., 2009), the Kosmotogales can be hypothesized to have acquired wide growth temperature

## Temperature responses in *Kosmotoga olearia*

93 tolerance secondarily by expanding its gene repertoire. Moreover, it is likely that the ability of the  
94 *Kosmotogales* common ancestor to grow at low temperatures enabled the evolution of mesophily in  
95 *Mesotoga* (Pollo et al., 2015).

96 Such adaptations of lineages to new environments can be greatly facilitated by lateral gene  
97 transfer (LGT), since genes already "adapted" to the new conditions are readily available in the  
98 microbial communities of the new environment (Boucher et al., 2003). For instance, LGT has been  
99 implicated in adaptation to high temperature growth in hyperthermophilic bacteria, including  
100 *Thermotoga* spp., and to low temperature growth in archaea (López-García et al., 2015; Pollo et al.,  
101 2015; Boucher et al., 2003). Genome analysis of the mesophilic *Mesotoga prima* revealed that it  
102 laterally acquired 32% of its genes after it diverged from other *Thermotogae* lineages (Zhaxybayeva  
103 et al., 2012). Many of the predicted gene donors are mesophiles, supporting the importance of lateral  
104 acquisition of genes already adapted to mesophilic conditions in the evolution of *Mesotoga*.

105 To further gain insights into mechanisms of bacterial temperature response we sequenced 19  
106 transcriptomes from isothermal and temperature-shifted cultures of *K. olearia* and examined  
107 transcriptional differences at temperatures spanning its wide growth range. Additionally, through  
108 comparative genomic and phylogenetic analyses of identified temperature responsive genes and their  
109 homologs in two newly sequenced *Kosmotoga* isolates, as well as in genomes of other thermophilic  
110 and mesophilic *Thermotogae*, we investigated the importance of within-lineage evolution through  
111 LGT and gene duplication for adaptation of *K. olearia* to growth over a wide temperature range.

## 112 2 Material and Methods

### 113 2.1 Bacterial culturing

114 *K. olearia* TBF 19.5.1 (DSM 21960(T), ATCC BAA-1733(T), Genbank accession number  
115 NC\_012785) was grown at different temperatures (4°C, 25°C, 30°C, 40°C, 65°C, and 77°C), but  
116 otherwise optimal conditions, in *Kosmotoga* medium (KTM) using pyruvate as growth substrate as  
117 described in (DiPippo et al., 2009). Cultures used as inocula were stored at 4°C, except those used for  
118 experiments at  $\geq 77^\circ\text{C}$ . Actively growing cultures at temperatures  $\geq 77^\circ\text{C}$  had to be used directly as  
119 inoculum because the cultures would not grow from inocula stored at either 4°C or room temperature  
120 ( $\sim 22^\circ\text{C}$ ). Replicate cultures received the same volume of inoculum; however, variable inoculum  
121 volume was used at different temperatures (Table S1 in Dataset S1), as larger inoculum volumes  
122 were required to achieve growth at the non-optimal temperature treatments. Due to the very slow  
123 growth rate at 25°C and lack of growth at 4°C, cultures were first grown at 30°C, and then  
124 transferred into new medium (25 mL) as a 50% inoculum (25 mL) and incubated at 25°C or 4°C,  
125 respectively, for 24 h.

### 126 2.2 Measurement of *K. olearia* growth at different temperatures

127 Growth curves were constructed from optical density measurements at 600 nm ( $\text{OD}_{600}$ ) using an  
128 Ultrospec 3100 pro. For cultures grown at 40°C, 65°C, 77°C, and 78°C two sets of triplicate bottles,  
129 inoculated from the same inoculum 12 h apart, were monitored for a 12 h period per day to generate  
130 the growth curves. The cultures for isothermic growth at 40°C, 65°C, 77°C, and 78°C were  
131 monitored hourly, while the cultures for shifted growth at these temperatures were monitored every  
132 1-5 hours. At 30°C one set of triplicate bottles was monitored once daily. Isothermic growth curves  
133 were calculated from six replicates, except for the curves for 30°C and 77°C that had three and 12  
134 replicates, respectively. All shifted growth curves consisted of six replicate cultures, except for 40°C  
135 and 30°C which had four and three replicates, respectively. To determine growth rates (Figure 1), for

## Temperature responses in *Kosmotoga olearia*

136 each culture the  $\ln OD_{600}$  was plotted against growth time and the curve was fitted with a linear trend  
137 line. The growth rate was defined as the slope at the log phase. To determine the time span of each  
138 growth phase (Figure S1), full composite growth curves were constructed using pooled replicate data.  
139 For each curve,  $OD_{600}$  for all replicates was plotted against growth time and a polynomial regression  
140 trend line was fitted.

141

### 142 **2.3 Cultivation of *Kosmotoga* sp. DU53 and *K. arenicorallina*, and confirmation of their** 143 **growth temperature ranges**

144 *Kosmotoga* sp. DU53 was grown in KTM as described above for *K. olearia*. *K. arenicorallina* was  
145 also grown in KTM; however, maltose was used as substrate (2.5 mL and 0.5 mL 10% maltose was  
146 added to serum bottles and Hungate tubes, respectively). One mL of culture was used as inoculum for  
147 all cultures (bottles and tubes). The temperature range of each strain was assessed by examination of  
148 culture turbidity as a proxy for growth. Starting from cultures grown at optimal growth temperature  
149 (~ 65°C for *Kosmotoga* sp. DU53 and 60°C for *K. arenicorallina*), new cultures were shifted in  
150  $\leq 10^\circ\text{C}$  increments. If growth was observed after a shift, then that culture was used to initiate a new  
151 culture. The shifting procedure was terminated when growth was no longer evident at a given  
152 temperature.

### 153 **2.4 RNA isolation and processing**

154 For each temperature treatment, RNA was extracted in either mid-log phase or late-log phase, using  
155 the Zymo Research Fungal/Bacterial RNA MiniPrep Kit (Cedarlane Laboratories, Ltd.; Burlington,  
156 Ontario) and following the manufacturer's protocols (Table S1 in Dataset S1). For experiments at  
157 65°C, 77°C, 40°C, and 30°C cultures used for RNA extraction were inoculated from cultures that had  
158 been grown under the same temperature conditions for at least three transfers. The time at which a  
159 culture was expected to be in a desired growth phase was determined from the composite growth  
160 curves (Figure S1), and was used as a cell harvesting time (listed in Table S1 in Dataset S1). This  
161 procedure avoided exposure of the cultures to the lower ambient temperatures in the laboratory  
162 during subsampling. For the 30°C cultures,  $OD_{600}$  was additionally measured 24 h before harvesting  
163 to ensure the culture was in mid log phase. In order to stabilize the transcripts and to avoid any  
164 transcriptional response to the change in temperature, an equal volume of "stop solution" (10%  
165 phenol in ethanol) was added to sealed cultures via syringe immediately upon removal from the  
166 incubator.

167 Following recommendations in (Haas et al., 2012), we aimed to sequence ~3 million non-  
168 ribosomal-RNA reads per sample. Ribosomal RNA (rRNA) depletion was performed on all samples  
169 using the Ribo-Zero rRNA Removal Kit (Gram-Positive Bacteria) Magnetic Kit (MRZGP126,  
170 Epicentre). On average, two rRNA depletions were needed to generate sufficient input RNA (200-  
171 500 ng for Ion Torrent PGM and 10-400 ng for Illumina MiSeq), although some samples required as  
172 many as five rRNA depletions. Quality and quantity of the total RNA, as well as efficiency of rRNA  
173 depletion, were assessed on an Agilent 2100 Bioanalyzer RNA Nano chip or RNA Pico chip  
174 following the manufacturer's instructions for "Prokaryote Total RNA". mRNA successfully depleted  
175 of rRNA was used to construct RNA-Seq libraries following the manufacturer's instructions, and  
176 sequenced on either an Ion Torrent PGM (RNA-Seq kit V2; transcriptomes are labeled with an "IT"  
177 suffix) or an Illumina MiSeq (TruSeq RNASEq v2 2x100 bp). The platform and RNA extraction  
178 technique used for each transcriptome are summarized in Table S1 in Dataset S1. The transcriptomes

## Temperature responses in *Kosmotoga olearia*

179 are available in the Sequence Read Archive (<http://www.ncbi.nlm.nih.gov/sra>) under the accession  
180 number SRP075860.

### 181 2.5 Architecture of the *K. olearia* transcriptome

182 Transcription start and stop sites were identified using Rockhopper (McClure et al., 2013) on the  
183 Illumina transcriptomes (Table S1 in Dataset S1). The following settings were used: Strand specific,  
184 No; Test for differential expression, Yes; Reverse complement reads, No; Orientation of mate-pair  
185 reads, forward-reverse; Maximum bases between paired reads, 500 bp; Allowed mismatches, 0.15;  
186 Minimum seed length, 0.33; Identify transcript boundaries, Yes; Predict operons, Yes; Minimum  
187 expression of UTRs and ncRNAs, 0.5; Minimum reads mapping to a transcript, 20; Minimum  
188 transcript length, 50 bp; Minimum count to seed a transcript, 50; and Minimum count to extend a  
189 transcript, 5.

### 190 2.6 RNA-Seq analysis

191 For each transcriptome, sequenced reads were analyzed using the "RNA-Seq" function in CLC  
192 Genomics Workbench version 7.0.4. Briefly, reads were first trimmed using an ambiguous limit of 2  
193 and a quality limit of 0.05. To remove sequences that matched remaining rRNA transcripts, the  
194 trimmed reads were subjected to a relaxed mapping protocol: only rRNA genes were used as a  
195 "reference genome", reads were mapped only to the reference sequences using similarity fraction of  
196 0.5; length fraction was set to 0.5; all other parameters were set to default (maximum number of hits  
197 for a read = 10, map to both strands, mismatch cost = 2, insertion cost = 3, deletion cost = 3, auto-  
198 detect paired distances, color space alignment, color error cost = 3). The mapped reads were  
199 designated as rRNA and were removed from further analysis.

200 The remaining reads were subjected to an RNA-Seq protocol with strict mapping parameters  
201 (allowing mapping to intergenic regions, similarity fraction = 0.95; length fraction = 0.95; all other  
202 default settings as described above) using the *K. olearia* annotated genome as a reference.  
203 Unmapped reads were discarded. Expression levels for every gene were estimated using "Reads Per  
204 Kilobase of transcript per Million mapped reads" (RPKM) values.

205 RPKM values for all genes are listed in Table S4 in Dataset S1. Differentially expressed  
206 genes were identified by doing pairwise comparisons of Illumina transcriptomes of the isothermally  
207 grown cultures at 30°C, 40°C, and 77°C to the cultures grown at the optimal temperature of 65°C.  
208 The analyses used the "Empirical Analysis of DGE" function, which employs the "Exact Test" for  
209 two-group comparisons (Robinson and Smyth, 2008). A gene was considered differentially expressed  
210 in a pairwise comparison if it had (i) > 20 reads in at least one of the two transcriptomes, (ii) a  
211 statistically significant difference in the RPKM values (corrected for multiple testing using False  
212 Discovery Rate [FDR] < 0.05), and (iii) a difference in RPKM values at least two-fold in magnitude.  
213 Principal Component Analysis (PCA) and biplot visualization were performed using R packages  
214 *ade4* and *bpca* respectively (Dray et al., 2007; Faria et al., 2013). Each gene was assigned to a  
215 Clusters of Orthologous Groups (COG; (Galperin et al., 2015)) functional category using the  
216 Integrated Microbial Genomes (IMG) portal (Markowitz et al., 2014). Genes assigned to more than  
217 one COG category were counted in all assigned categories.

218 Pearson correlation of expression values and growth rates were calculated in Microsoft Excel.  
219 ANCOVA, linear regression and likelihood ratio tests were carried out in R. The "growth rate only"  
220 model was the linear regression (expression = growth rate). In the ANCOVA model growth rates was  
221 set as the quantitative variable and temperature as qualitative variable (expression = growth rate +  
222 temperature). The growth rates used were 0.006 for 30°C, 0.087 for 40°C, 0.274 for 65°C and 0.107

## Temperature responses in *Kosmotoga olearia*

223 for 77°C (see Figure 1). When comparing the most significant temperature coefficient to the growth  
224 rate coefficient, the latter was scaled by the average growth rate. The growth rate effect was defined  
225 as being greater than the temperature rate effect if  $|\text{temperature}/(\text{growth rate} * 0.115)| < 1$ .

### 226 **2.7 Identification of genes involved in growth on pyruvate**

227 *K. olearia* genes predicted to be involved in pathways for pyruvate conversion to acetate, CO<sub>2</sub>, H<sub>2</sub>  
228 and ATP were retrieved from the KEGG (Kanehisa et al., 2014) and BioCyc (Caspi et al., 2014)  
229 databases. Genes encoding hydrogenases were taken from (Schut et al., 2012), and genes encoding  
230 the F-type ATPase subunits were identified using IMG (Markowitz et al., 2014).

### 231 **2.8 Fatty acids analysis**

232 Total lipids were extracted from *K. olearia* grown at 40°C to early stationary phase and 65°C to mid-  
233 log, early stationary, late stationary and death phase by using methanol-chloroform (1:1 v/v). Fatty  
234 acid methyl esters (FAME) were prepared from total lipids extracts using mild alkaline methanolysis  
235 (Guckert et al., 1985). Dried FAME samples were re-dissolved in 300 µl chloroform (HPLC grade,  
236 Fisher Scientific) and analyzed by gas chromatography with mass spectrometry (GC-MS) on an  
237 Agilent 6890N gas chromatograph with a model 5973 inert mass selective detector (Agilent) fitted  
238 with an Agilent HP-5MS capillary column (30 m × 0.25 mm ID, 0.25 µm film thickness; J + W  
239 Scientific). Helium was used as the carrier gas with a temperature program of 130°C increasing at  
240 3°C min<sup>-1</sup> to 290°C and held for 2 min. Sample peaks were identified by comparison to Bacterial  
241 Acid Methyl Ester Mix standards (Supelco, Sigma Aldrich) or on the basis of mass spectra and  
242 expressed as a percentage of the total FAME quantified in each sample.  
243

### 244 **2.9 Comparative analyses of three *Kosmotoga* spp. genomes**

245 The genome of *K. olearia* was compared to genomes of *Kosmotoga* sp. DU53 (accession number  
246 JFHK00000000) and *K. arenicorallina* (accession number JGCK00000000) (Pollo et al., 2016) using  
247 the IMG portal (Markowitz et al., 2014) and Geneious v.9. Specifically, genes were declared  
248 homologous if they were significantly similar in BLASTP and TBLASTN (Altschul et al., 1997)  
249 searches (E-value < 10<sup>-3</sup>). For phylogenetic analyses, additional homologs of *K. olearia* genes were  
250 retrieved from the NCBI non-redundant (*nr*) protein database and the IMG databases via BLASTP  
251 searches, retaining the 100 top-scoring matches with E-value < 10<sup>-3</sup>. Sequences were aligned using  
252 MAFFT (Kato et al., 2002), and phylogenetic trees were reconstructed using RAxML (Stamatakis,  
253 2006), as implemented in Geneious v. 9.1.3. Homologs from the recently released genome of  
254 *Kosmotoga pacifica* (NZ\_CP011232) (L'Haridon et al., 2014) were included in gene-specific  
255 phylogenetic analyses. Pairwise Average Nucleotide Identity (ANI) (Goris et al., 2007) was  
256 calculated using the Enveomics Toolbox (Rodriguez-R and Konstantinidis, 2016).

### 257 **2.10 Detection of laterally transferred genes**

258 A customized version of HGTector (Zhu et al., 2014) (available through <https://github.com/ecg-lab/hgtector>)  
259 was used to identify putatively transferred protein-coding genes in the *K. olearia*  
260 genome. Homologs of each annotated protein-coding open reading frame (ORF) in the NC\_012785  
261 GenBank record were retrieved from a local copy of the NCBI *nr* database (downloaded November  
262 21, 2014) using the BLASTP program from BLAST 2.2.28+ (Altschul et al., 1997). Sequences were  
263 first filtered for low complexity regions using the *seg* algorithm. Then, only matches with E-value

## Temperature responses in *Kosmotoga olearia*

264  $<10^{-5}$  and sequence coverage  $\geq 70\%$  were retained. Database matches were expanded according to  
265 the *MultispeciesAutonomousProtein2taxname* file from RefSeq release 68. This was necessary as  
266 some genes across various taxonomic ranks were combined into a single entry in RefSeq, which  
267 artificially decreased the representation of these genes in Close and Distal groups (see below), and  
268 would confound downstream analysis. Taxonomic affiliation of each match was assigned using the  
269 NCBI Taxonomy database (downloaded on November 21, 2014). Only 500 top-scoring matches  
270 (after filtering for sequence coverage) were used as input for HGTector. The "Self" group was  
271 defined as TaxID 651456 (genus *Kosmotoga*), and the "Close" group was defined as either TaxID  
272 1184396 (genus *Mesotoga*, a sister group) or TaxID 2419 (order Thermotogales, comprising  
273 *Thermotoga*, *Mesotoga*, and *Kosmotoga*). In either case, the "Distal" group comprised the remaining  
274 taxonomic groups. The conservative cutoff (the median between the zero peak and the first local  
275 minimum) was used for both the "Close" and "Distal" groups. A gene was designated as putatively  
276 transferred if its "Close" score was below the cutoff and its "Distal" score was above the cutoff.  
277 Putatively transferred genes with no top-scoring match in Thermotogae were designated as recent  
278 transfer events into *K. olearia* (labelled "K" in Table S8 in Dataset S1). Putatively transferred genes  
279 for which the difference between Close(Thermotoga) and Close(Mesotoga) scores was  $<1$  were  
280 designated as gene transfer events into Kosmotogales (*i.e.*, *Kosmotoga* and *Mesotoga*; labelled  
281 "K+M" in Table S8 in Dataset S1).

282

### 283 3 Results and Discussion

#### 284 3.1 Temperature shifts and isothermic conditions elicit different growth patterns in *K.* 285 *olearia*.

286 Under laboratory conditions in liquid anaerobic medium we observed growth of *K. olearia* at  
287 temperatures as low as 25°C and as high as 79°C, with optimal growth at 65°C, defined as the  
288 temperature affording the fastest growth rate (Figure 1 and Figure S1). Using a non-linear regression  
289 model (Ratkowsky et al., 1983) we estimate a growth-permissive temperature range of 20.2 – 79.3°C,  
290 consistent with the previously reported wide growth range of this isolate (DiPippo et al., 2009).  
291 Interestingly, we were not able to cultivate *K. olearia* at temperatures near its range boundaries (30°C  
292 and 77°C) by direct transfer from 65°C cultures. Instead, the growth temperature had to be changed  
293 sequentially in  $\leq 10^\circ\text{C}$  increments. Particularly at the extremes, even small temperature shifts caused  
294 both a longer lag phase and a slower growth rate compared to isothermal cultures (Figure 1 and  
295 Figure S1). This phenomenon has also been noted for mesophilic bacteria, especially for transitions  
296 from high to low temperature (Swinnen et al., 2004). Our observations suggest that cells shifted to a  
297 new temperature need to undergo large physiological changes that require time (*i.e.* an 'acclimation'  
298 period (Barria et al., 2013)) and that these physiological challenges are too great to overcome when  
299 temperature changes are large. To illuminate *K. olearia*'s transcriptional responses to changes in  
300 temperature we sequenced 19 transcriptomes of replicate mid- to late-log cultures grown isothermally  
301 at 30°C, 40°C, 65°C, and 77°C, and of two 30°C cultures shifted to 25°C and 4°C (see Table S1 in  
302 Dataset S1 and Text S1).

#### 303 3.2 Architecture of the *K. olearia* transcriptome

304 Analysis of transcription start and stop sites predicted a minimum of 916 transcriptional units (TU) in  
305 *K. olearia* (Text S1 and Table S2 in Dataset S1), 52% of which consist of a single gene. This fraction  
306 of single-gene TUs lies between the 65% reported for *E. coli* (Cho et al., 2009) and the 43% recorded



## Temperature responses in *Kosmotoga olearia*

307 for *T. maritima*, which has also been shown to have a streamlined genome and a low-complexity  
308 transcriptome (i.e., few sub-operonic transcripts and few genes with multiple start sites) (Latif et al.,  
309 2013). The average TU length of ~2.39 genes in *K. olearia* is less than the 3.3 genes per transcript of  
310 *T. maritima* (Latif et al., 2013) but closer to 2.2 genes per transcript in the mesophilic firmicute  
311 *Geobacter sulfurreducens* (Qiu et al., 2010) and 1-2 genes per transcript in bacteria in general (e.g.  
312 (Cho et al., 2009)). Given that the *K. olearia* genome has more intergenic DNA than *T. maritima*'s  
313 genome (the ratio of the nucleotides located in non-coding vs. coding regions is 0.13 in *K. olearia*  
314 and 0.06 in *T. maritima*), the shorter TU lengths in *K. olearia* may point to more flexible  
315 transcriptional regulation.

316

### 317 **3.3 Consistent energy generation across different temperature conditions**

318 *K. olearia* produces ATP from pyruvate using a biochemically well-understood fermentation  
319 pathway that generates hydrogen, carbon dioxide and acetate ((DiPippo et al., 2009); Figure 2 and  
320 data not shown). Given that pyruvate was the carbon and energy source provided in all experiments,  
321 we surveyed 51 genes predicted to be involved in core energy metabolism during growth on  
322 pyruvate. The model in Figure 2 accounts for all of the major end products during growth at 65°C  
323 and contains 15 genes with consistently high expression across all temperature treatments (Table S3  
324 in Dataset S1). In addition to indirectly validating the previously known functional annotations of  
325 these genes, we furthermore propose that the most highly expressed ABC-transporter gene cluster,  
326 Kole\_1509 – 1513, encodes a pyruvate transporter (Figure 2). Its current annotation as a peptide  
327 ABC transporter may be erroneous since most of the peptide ABC transporters predicted in *T.*  
328 *maritima* using bioinformatics have been shown instead to bind and transport sugars (Nanavati et al.,  
329 2006). However, functional studies of the transporter (e.g. binding assays, expression with different  
330 substrates) are needed to confirm this hypothesis.

331

### 332 **3.4 Identification of temperature-related transcriptional responses in *K. olearia***

333 Based on hierarchical clustering, transcriptome replicates at the same temperature group together  
334 (Figure S2 and Text S1), suggesting that the observed changes in transcription are due to the culture  
335 growth temperature. Principal Component Analysis (PCA) clearly separated the transcriptomes into  
336 quadrants corresponding to optimal (65°C), intermediate (40°C), low (30°C, 25°C and 4°C) and high  
337 (77°C) growth temperatures (Figure 3). Several genes with a high correlation between their  
338 expression level and a specific growth temperature (vectors in Figure 3, Table S4 in Dataset S1) are  
339 known to be involved in temperature response (Pollo et al., 2015). For example, expression of the  
340 heat shock serine protease Kole\_1599 positively correlated with the 77°C transcriptomes, where high  
341 expression of this protease was expected based on its involvement in heat shock response in *T.*  
342 *maritima* (Pysz et al., 2004). Similarly, expression of the cold shock protein genes Kole\_0109 and  
343 Kole\_2064 positively correlated with low temperature growth. Lastly, some observed changes  
344 presumably were due to the expected decreased metabolic activity of the culture at sub- and supra-  
345 optimal temperatures. This can be exemplified by the high expression and strong correlation of the  
346 central carbon metabolism gene glyceraldehyde-3-phosphate dehydrogenase (Kole\_2020) with the  
347 65°C transcriptomes.

## Temperature responses in *Kosmotoga olearia*

348 Putative temperature-responsive genes were identified by pairwise comparisons of isothermic  
349 temperature treatments to the optimal condition of 65°C (i.e., 30°C vs 65°C, 40°C vs 65°C, and 77°C  
350 vs 65°C). To remove any confounding effects of differential sample handling, only the 8 Illumina  
351 transcriptomes from cultures processed in identical fashion were included in this analysis (see Table  
352 S1 in Dataset S1 and Text S1). Across all comparisons 573 genes fulfilled our criteria for  
353 temperature responsiveness (i.e.,  $\geq 2$ -fold difference in expression,  $> 20$  reads per transcript, False  
354 Discovery Rate  $< 0.05$ ) with 430, 115, and 169 genes detected in the 30°C vs 65°C, 40°C vs 65°C,  
355 and 77°C vs 65°C comparisons respectively (Table S5 in Dataset S1). It should be noted that  
356 although we label these genes as “temperature responsive”, they may additionally respond to other  
357 similar environmental stressors (e.g., DNA damage, desiccation, starvation).

358 Batch culture cannot selectively discern gene expression that is exclusively influenced by  
359 temperature from expression that is solely growth rate-dependent. In theory, continuous culture  
360 conducted at a single growth rate could afford such discrimination. However, given the extremely  
361 slow growth of *K. olearia* near its temperature maxima and minima (Figure 1), it was not feasible to  
362 use anaerobic bioreactors to cultivate cells at this marginal growth rate across the temperature range.  
363 Hence, in order to assess how differences in growth rates influence the expression patterns, we  
364 examined correlations of the expression pattern of the putative temperature responsive genes with  
365 growth rates calculated at each temperature. Indeed, expression of 306 of the 573 putative  
366 temperature-responsive genes strongly correlated with growth rate ( $r > |0.7|$ ; Table S5 in Dataset S1).  
367 To detect which of the 306 genes are significantly influenced by growth rate, we performed  
368 ANCOVA analyses with growth rate as the quantitative variable and temperatures as qualitative  
369 treatments. For 60 genes the growth rate was a significant factor ( $p < 0.05$ ; Table S5 in Dataset 1).  
370 However, for 26 of the 60 genes ANCOVA suggested that temperature was also a significant factor  
371 and the likelihood ratio test (LRT) rejected the simpler growth-rate-only model for all but 13 of the  
372 60 genes (FDR-corrected  $p$ -value  $< 0.05$ ; Table S5 in Dataset S1). Comparison of the most  
373 significant temperature coefficient to the growth rate coefficient revealed that growth rate had larger  
374 influence on expression of 51 genes (Table S5 in Dataset S1). LRT rejected the growth-rate-only  
375 model for 10 of these 51 genes. Among these genes were the glyceraldehyde-3-phosphate  
376 dehydrogenase (Kole\_2020) mentioned above, the iron-containing alcohol dehydrogenase  
377 (Kole\_0742) discussed in Supplemental Material. Therefore, although we retained the designation of  
378 “putatively temperature-responsive” for all 573 genes, in the discussion below we focus on the genes  
379 not primarily affected by growth rate.

380

### 381 **3.5 Detailed analysis of changes in gene expression in response to prolonged growth at** 382 **different temperatures**

383 Most of the temperature responsive genes were up-regulated compared to the expression at 65°C  
384 (Figure S3). However, many genes involved in carbohydrate and energy metabolism were down  
385 regulated at 30°C (Clusters of Orthologous Groups [COG] categories C and G), while genes from  
386 COG C and G categories were over-represented and up-regulated at 77°C (Figure 4 and Figure S3;  
387 discussed in detail below).

388 In all transcriptomes the list of putative temperature-responsive genes was diminished in  
389 genes involved in translation (COG category J) and nucleotide metabolism (COG category F) (Figure  
390 4 and Figure S3) and conversely enriched in genes involved in replication, recombination and repair  
391 (COG category L, particularly at 30°C), and signal transduction (COG category T). Most of the

## Temperature responses in *Kosmotoga olearia*

392 identified COG category L genes are either mobile elements or CRISPR-associated proteins.  
393 Movement of mobile genetic elements is a common feature of stress responses (Foster, 2007).  
394 Differential expression of the signal transduction genes suggests the importance of these systems for  
395 regulating cellular responses at all tested temperatures. Additionally, at both 30°C and 77°C many  
396 genes encoding transcription regulators (COG category K, transcription) are up-regulated, suggesting  
397 that prolonged growth at sub- and supra-optimal temperatures results in detectable changes in  
398 transcriptional gene regulation in *K. olearia*.

399 Below we discuss the identified temperature-responsive gene expression patterns in more  
400 detail, focusing on genes that did not show an effect from growth rate.

401

### 402 **3.5.1 At 40°C there are pronounced differences in membrane fatty acid composition but no** 403 **signs of cold stress**

404 Although the growth rate of *K. olearia* at 40°C is only one-third of that at the optimum 65°C (Figure  
405 1 and Figure S1), clustering analysis suggested that the 40°C transcriptome was most similar to that  
406 at 65°C (Figure 3 and Figure S2). The slower growth rate was reflected by the four most highly  
407 expressed temperature responsive genes at 40°C showing significantly lower expression than at  
408 65°C, including the growth-rate dependent alcohol dehydrogenase (Kole\_742, Table S5 in Dataset  
409 S1). Yet, 94 of 115 putative temperature responsive genes were up-regulated (Table S5 in Dataset  
410 S1), suggesting that slower metabolism is not the only explanation for the observed transcriptional  
411 response to growth at 40°C.

412 Lipid metabolism (COG category I) appears to be particularly important at 40°C. For  
413 instance, all of the predicted fatty acid synthesis genes showed the highest expression at 40°C (Table  
414 S5 in Dataset S1 and Figure S4), with two genes involved in synthesis of unsaturated fatty acids  
415 (Kole\_0968) and initiation of fatty acid synthesis (Kole\_0969) having significantly higher  
416 expression. Biochemical analyses of total fatty acids at 40°C and 65°C showed a much greater  
417 diversity of fatty acids at 40°C (Table S6 in Dataset S1), which may explain the higher demand for  
418 these genes at lower temperatures. Interestingly, at 40°C in particular, there was increased expression  
419 of a phosphate ABC transporter (Kole\_0707 – Kole\_0711, Table S5 in Dataset S1), which may be  
420 linked to increased production of polar membrane lipids at moderately low temperatures.  
421 Maintenance of a functional cell membrane is crucial for survival, and bacteria respond to changes in  
422 temperature by altering the membrane's fatty acid composition (de Mendoza, 2014). The observation  
423 that lipid metabolism genes were among the highly expressed genes at low temperature, despite the  
424 lower growth rate, suggests that changes to the cell membrane composition are one of the most  
425 important adaptations for survival of *K. olearia* at lower temperatures.

426 Proper protein folding at a lower temperature is another physiological challenge that may  
427 require enzymatic assistance. For example, proline isomerization happens spontaneously at high  
428 temperatures, but at lower temperatures (e.g., 37°C) the reaction needs a catalyzing enzyme -  
429 peptidylprolyl isomerase (PPIase) (Godin-Roulling et al., 2015). Not surprisingly, *K. olearia* has  
430 three temperature-responsive PPIase genes: two PpiC-type genes (Kole\_1682 and Kole\_0383) that  
431 are both highly expressed at 40°C, and one FKBP-type gene (Kole\_1745) that shows high expression  
432 at all temperatures except 77°C (Table S5 in Dataset S1). These expression patterns suggest PPIase is  
433 particularly important at moderately low temperatures where the cells are still relatively active.  
434 However, the enzymes known to assist protein folding in cellular stress responses, chaperones (e.g.,  
435 GroEL and Hsp) and protease Do, were significantly down-regulated at 40°C (Table S5 in Dataset  
436 S1), contributing to the enrichment of differentially expressed genes from COG category O (Post-  
437 translational modification, protein turnover, chaperone function) at 40°C in Figure 3. Among other

## Temperature responses in *Kosmotoga olearia*

438 typical cold stress-related proteins, only one of *K. olearia*'s three cold shock proteins (Kole\_0109)  
439 showed significantly higher expression at 40°C and its up-regulation was merely moderate when  
440 compared to its expression levels at 30°C (Table S5 in Dataset S1). This overall lack of induction of  
441 typical stress-related genes, especially when compared to 30°C and 77°C (see below), suggests that  
442 40°C is still within the "Goldilocks" temperature range for *K. olearia*.

443

### 444 3.5.2 *K. olearia* is in cold stress at 30°C

445 Transcriptomes from 30°C, 25°C, and 4°C cultures were very similar to each other (Figure 3 and  
446 Figure S2). However, due to adjustments in culture handling required to obtain enough biomass at  
447 lower temperatures (see materials and methods), some gene expression patterns observed at 25°C and  
448 4°C may be due to the cells either responding to fresh medium or displaying an immediate cold  
449 shock response. Therefore, we focused further analyses on genes differentially expressed at 30°C and  
450 used the 25°C and 4°C transcriptomes only to confirm the patterns observed at 30°C.

451 Two of three Csp-encoding genes in *K. olearia* (Kole\_0109 and Kole\_2064, Table S5 in  
452 Dataset S1) were among the three most highly expressed up-regulated genes at low temperatures,  
453 suggesting that the cells were in a cold-stressed state during growth at  $\leq 30^\circ\text{C}$ . Further support for this  
454 hypothesis comes from significant up-regulation of genes linked to bacterial cold response (Barria et  
455 al., 2013) including a DEAD/DEAH-box RNA helicase (Kole\_0922), *rbfA* (Kole\_2103) and *nusA*  
456 (Kole\_1529). Hence, the thermophile *K. olearia* uses homologs of the cold response genes employed  
457 by mesophilic bacteria at physiologically low temperatures.

458 With decreasing temperature, we observed up-regulation of several ribosomal proteins  
459 (Figure 3). Some (L10 (Kole\_1840) and L7/L12 (Kole\_1839)) have already been linked to both cold  
460 shock and prolonged low temperature growth responses in bacteria (e.g., (Alreshidi et al., 2015)).  
461 The most dramatic differential expression, however, was observed for a ribosomal protein gene not  
462 yet connected to cold response (L34; Kole\_0258). L34, a bacteria-specific ribosomal protein  
463 hypothesized to be a relatively recent addition to the evolving ribosome (Fox, 2010), is required for  
464 proper ribosome formation (Akanuma et al., 2014). A *Bacillus subtilis* mutant lacking the L34 gene  
465 showed particularly slow growth at low temperature (Akanuma et al., 2012), suggesting a role for  
466 L34 in this condition. Many ribosomal proteins are recruited for extra-ribosomal functions (Bhavsar  
467 et al., 2010), hence some of the up-regulated ribosomal proteins may have alternative roles in  
468 response to low temperature that are unrelated to the ribosome itself. However, genes encoding  
469 ribosomal RNA (rRNA) methyltransferases, *rmlH* (Kole\_1718) and *rmlL* (Kole\_0897), were also  
470 significantly up-regulated, and methylation of rRNAs has been associated with responses to  
471 environmental stress, including temperature (Baldrige and Contreras, 2014). Combined with  
472 observations that ribosomes need to be fine-tuned to function properly at low temperature (Barria et  
473 al., 2013), we hypothesize that *K. olearia* modifies its ribosome by changing stoichiometry of its  
474 components and by methylating rRNA. Time required for such ribosomal adjustments could also  
475 explain the longer lag phase following temperature shifts (Figure S1).

476 To detect a decrease in environmental temperature and elicit an appropriate regulatory  
477 response, some bacteria have evolved two-component cold sensors (de Mendoza, 2014). These signal  
478 transduction systems consist of a sensor, a membrane-integrated protein with a kinase domain that  
479 detects changes in the fluidity of the cell membrane, and the cytoplasmic response regulator, a  
480 protein that induces expression of cold-responsive genes. In *K. olearia*, a histidine kinase with two  
481 predicted transmembrane domains (Kole\_1017) and two response regulators (Kole\_1015 and  
482 Kole\_1016) showed a steady increase in expression as temperatures decreased from 65°C, but no

## Temperature responses in *Kosmotoga olearia*

483 significant change in expression at 77°C (Table S5 in Dataset S1), leading us to hypothesize that  
484 these genes encode a cold-sensing two-component system.

485

### 486 3.5.3 Increased amino acid metabolism at sub-optimal temperatures

487 At lower growth temperatures (and especially  $\leq 30^\circ\text{C}$ ) we observed an over-representation of highly  
488 expressed genes involved in amino acid metabolism (COG category E). Also, at  $30^\circ\text{C}$ , and to a lesser  
489 extent at  $40^\circ\text{C}$ , several genes in the arginine (Kole\_0092 – Kole\_0097) and lysine (Kole\_0104 –  
490 Kole\_0107,  $30^\circ\text{C}$  only) biosynthesis pathways were up-regulated, suggesting the potential for  
491 accumulation of peptides and amino acids (or their intermediates) at lower temperatures. Although  
492 the inferred effect of temperature was larger than the effect of growth rate for all lysine biosynthesis  
493 genes (Table S5 in Dataset S1), the growth-rate-only model was rejected only for one of the genes,  
494 leaving the possibility that the expression of the lysine biosynthesis genes may be growth rate  
495 dependent. At  $30^\circ\text{C}$  there was also significant up-regulation of a citrate synthase gene (Kole\_1230).  
496 Intriguingly, in *Staphylococcus aureus* citrate was shown to accumulate during prolonged cold stress  
497 (Alreshidi et al., 2015), which could also be the case for *K. olearia*. Alternatively, citrate synthase,  
498 together with isocitrate dehydrogenase (Kole\_1227), may be involved in converting pyruvate or  
499 acetyl-CoA to 2-oxoglutarate, a precursor for several amino acids including arginine. Accumulation  
500 of both arginine and lysine was observed during low temperature growth of *Clostridium botulinum*,  
501 where these amino acids were suggested to act as compatible solutes (Dahlsten et al., 2014).  
502 Interestingly, while the cells may accumulate peptides at  $30^\circ\text{C}$ , at  $40^\circ\text{C}$  there was increased  
503 expression of an oligo-peptidase (Kole\_1190) and genes involved in lysine degradation (Kole\_0958,  
504 Kole\_0963 – Kole\_0966). Such distinguishably different metabolic responses to moderately low  
505 ( $40^\circ\text{C}$ ) and low ( $\leq 30^\circ\text{C}$ ) temperatures suggest a fine-tuned temperature-dependent peptide turnover.  
506 Two paralogs of ornithine carbamoyl-transferase genes (*argF*; Kole\_1433 and Kole\_2071) showed  
507 significantly lower expression at both  $40^\circ\text{C}$  and  $30^\circ\text{C}$ . The amino acid ornithine is an intermediate of  
508 arginine synthesis, and therefore lower expression of *argF* could result in ornithine, rather than  
509 arginine, accumulation. However, since the growth-rate-only model was not rejected for Kole\_2071  
510 (FDR-corrected p-value = 0.062) (Table S5 in Dataset S1), its high expression at  $65^\circ\text{C}$  could also be  
511 linked to the higher growth rate at this temperature.

512 Re-modelling of amino acid metabolism at low temperatures has also been observed in other  
513 bacteria (e.g., (Dahlsten et al., 2014; Ghobakhlou et al., 2015)). Interestingly, the genome of strictly  
514 mesophilic *M. prima* encodes more genes involved in amino acid metabolism than the genomes of  
515 thermophilic *K. olearia* and other Thermotogae (Zhaxybayeva et al., 2012). Amino acid metabolism  
516 genes are also among the most numerous bacterial genes laterally acquired by mesophilic archaea,  
517 which is hypothesized to reflect archaeal adaptation to low temperature growth (López-García et al.,  
518 2015).

519

### 520 3.5.4 *K. olearia* is in heat stress at $77^\circ\text{C}$

521 Both the multivariate (Figure 3) and clustering analyses (Figure S2) showed that the  $65^\circ\text{C}$  and  $77^\circ\text{C}$   
522 transcriptomes are distinct. Since  $77^\circ\text{C}$  is near the upper limit for *K. olearia* growth under our  
523 laboratory conditions, we hypothesize that the observed differences in expression profiles at  $77^\circ\text{C}$   
524 reflect a cell-wide heat stress response. Of the 169 differentially expressed genes, 119 showed  
525 increased expression at  $77^\circ\text{C}$  (Table S5 in Dataset S1). Hypothetical proteins comprise a sizeable  
526 fraction (41 genes; 34%) of the 119 genes, indicating that adaptation to growth at sustained high

## Temperature responses in *Kosmotoga olearia*

527 temperature remains largely uncharacterized. These genes are scattered across the genome (Table S2  
528 in Dataset S1) in 34 transcriptional units, each containing at most three of these genes. The majority  
529 of 41 genes have homologs in genomes of other *Kosmotoga* spp. (N=38), *Mesotoga* spp. (N=23), and  
530 other Thermotogae (N=26). Kole\_0654 has two paralogs (61 and 88% amino acid identity,  
531 respectively) in the genome (Kole\_0653 and Kole\_0630), while Kole\_0801 has an almost identical  
532 paralog (Kole\_0788, 99% amino acid identity). Putative functions could be inferred for some of the  
533 encoded proteins. Seventeen of the 41 proteins have predicted signal peptides, suggesting they are  
534 membrane-associated, and five (Kole\_0130, Kole\_0445, Kole\_0994, Kole\_1991, Kole\_2135) have  
535 similarity to domains that are either membrane- or cell-wall-associated. Moreover, Kole\_1430 and  
536 Kole\_1431 are co-transcribed with genes from a two-component system (Kole\_1428 and  
537 Kole\_1429), suggesting they may be involved in environmental sensing or signaling. Kole\_0652  
538 carries a PrcB-domain, which interacts with and stabilizes PrtP protease (Godovikova et al., 2010).  
539 Kole\_1314 (and its paralog Kole\_1297) contains an AbiEii-toxin domain, and may be part of a toxin-  
540 antitoxin system. Three of the co-transcribed hypothetical genes (Kole\_1266, Kole\_1267,  
541 Kole\_1270) are found in a cluster containing CRISPR-genes and two of them (Kole\_1266 and  
542 Kole\_1270) contain RAMP-domains suggesting CRISPR-related function (Makarova et al., 2011).

543 Only two of the known heat shock response genes (Pysz et al., 2004), the extreme heat stress  
544 sigma factor-24 (*rpoE*, Kole\_2150) and the heat shock protease (Kole\_1599), were up-regulated.  
545 Among the most highly expressed genes were those encoding the structural RNAs *ffs* (Kole\_R0010),  
546 *ssrA* (Kole\_R0006), and *rnpB* (Kole\_R0049) (Figure 3), suggesting an increased rate of RNA  
547 turnover at supra-optimal temperature. As discussed above, carbohydrate and energy metabolism  
548 genes (COG categories C and G) were also up-regulated. It is unclear, however, if the underlying  
549 cause is the increased turnover of enzymes at elevated temperatures, or a demand for more enzymes  
550 due to increased carbohydrate catabolism. Increased carbohydrate metabolism in response to  
551 prolonged growth at supra-optimal temperature has been observed previously in *T. maritima* (Wang  
552 et al., 2012) and therefore may be a common adaptation to high temperature growth in the  
553 Thermotogae. As for *K. olearia*, the prolonged supra-optimal temperature growth of *T. maritima* also  
554 did not involve up-regulation of typical heat-shock response proteins (Wang et al., 2012). This  
555 highlights the difference between cellular response to an immediate heat-shock and to prolonged  
556 growth at supra-optimal temperature (Balleza et al., 2009), and in general justifies classifying the  
557 cellular response to temperature into these two distinct categories.

### 558 3.6 Global regulators of temperature response

559 The transcriptional changes seen at the sub- and supra-optimal temperatures are likely to be  
560 controlled by one or a few global regulators (Balleza et al., 2009), and the analysis of COG  
561 functional categories revealed enrichment of genes involved in transcription regulation at both 30°C  
562 and 77°C (Figure 4). The two-component cold sensor up-regulated at low temperatures (Kole\_1015 -  
563 Kole\_1017) may represent one such global regulator, as observed for similar systems in  
564 cyanobacteria (de Mendoza, 2014). Another group of global regulators are sigma factors needed for  
565 transcription initiation (Buck et al., 2000). Interestingly, one sigma factor was significantly up-  
566 regulated at 77°C (Kole\_2150), while another was up-regulated at 30°C and 40°C (Kole\_1408)  
567 suggesting these may represent temperature-specific sigma factors. Kole\_2150 belongs to the sigma-  
568 24 ECF subfamily, which is activated in response to environmental stress (Balleza et al., 2009).  
569 Kole\_1408 belongs to the sigma-54 family, which is involved in enhancer-dependent transcription  
570 (Buck et al., 2000), introducing the possibility that this sigma factor may be a target of the two

## Temperature responses in *Kosmotoga olearia*

571 component cold sensor. Three genes annotated as anti-sigma regulatory factor and anti-sigma factor  
572 antagonists (Kole\_0441 – Kole\_0443) were also up-regulated at 30°C, and are probably involved in  
573 sigma factor regulation. Interestingly, Kole\_0440, encoding a response regulator which is co-  
574 transcribed with these genes (Table S2 in Dataset S1), is also significantly up-regulated at 30°C.

575

576 In addition, 23 of the 573 putative temperature-responsive genes are annotated as  
577 transcriptional regulators. Of them, 15 were significantly up-regulated at 30°C, one 40°C, and eight  
578 at 77°C. Interestingly, only one transcription regulator (Kole\_0294) was significantly down regulated  
579 (at 30°C). Experiments are needed to determine how these putative regulators activate or repress  
580 transcription of their target genes.

581

### 582 3.7 Conservation of *K. olearia*'s temperature-responsive genes across Kosmotogales

583 All genes that are required for adaptation and response of *K. olearia* strain TBF 19.5.1 to a wide  
584 range of growth temperatures are expected to be present in other *K. olearia* isolates, whereas some  
585 may be absent from *Kosmotoga* species having a narrower spectrum of growth temperature.  
586 Therefore, we compared the *K. olearia* genome to the genomes of *Kosmotoga* sp. DU53 and  
587 *Kosmotoga arenicorallina* (Pollo et al., 2016). *Kosmotoga* sp. DU53 has a similar growth  
588 temperature range (observed range 25°C - 79°C, Table S7 in Dataset S1) and >99% average  
589 nucleotide identity (ANI) when compared to *K. olearia*, while *K. arenicorallina* exhibits a narrower  
590 growth temperature range (observed range 35°C - 70°C, Table S7 in Dataset S1) and has only 84%  
591 ANI when compared to *K. olearia*.

592 Indeed, the *Kosmotoga* sp. DU53 genome lacks only 10 of the 573 *K. olearia* putative  
593 temperature-responsive genes (BLASTP and TBLASTN searches, E-value < 10<sup>-3</sup>, Table S5 in  
594 Dataset S1). All 10 genes were expressed in *K. olearia* at relatively low levels (the highest average  
595 expression value of 453 is for Kole\_0200 at 77°C), suggesting that they are unlikely to be essential  
596 for high or low temperature growth. On the other hand, the *K. arenicorallina* genome does not have  
597 detectable homologs of 103 of the 573 putative temperature-responsive genes in *K. olearia* (BLASTP  
598 and TBLASTN searches, E-value < 10<sup>-3</sup>) (Table S5 in Dataset S1). The list of absent genes includes  
599 several of the arginine and lysine biosynthesis genes that are up-regulated in *K. olearia* during  
600 growth at ≤30°C, and seven of the hypothetical proteins up-regulated at 77°C. Therefore, we  
601 hypothesize that a subset of these 103 genes may play a role in extending the growth range of *K.*  
602 *olearia* to ≤35°C and ≥70°C. However, directed experiments are needed to pinpoint the genes  
603 involved.

604

### 605 3.8 Role of lateral gene transfer in thermoadaptation of *K. olearia*

606 Obtaining "pre-adapted" genes from other genomes is one way prokaryotes adjust to new  
607 environmental conditions (Boucher et al., 2003). Using HGTector (Zhu et al., 2014) we predicted  
608 that 354 of *K. olearia*'s 2,118 protein coding genes have been acquired laterally by *K. olearia* or the  
609 Kosmotogales (i.e., *Kosmotoga* and *Mesotoga*), presumably representing LGT events occurring after  
610 the divergence of Kosmotogales from other Thermotogae (Table S8 in Dataset S1). Eighty-eight of  
611 the 354 genes were temperature responsive (Table S5 in Dataset S1, Figure S5A and S5B), including  
612 several previously discussed highly expressed genes (Table 1 and Table S5 in Dataset S1). Notably,  
613 76% of the 37 presumptively transferred temperature responsive genes that are shared with *Mesotoga*

## Temperature responses in *Kosmotoga olearia*

614 are upregulated at 30°C (Figure S5C), suggesting that acquisition of these genes has been important  
615 in adaptation to low temperature growth. Among these are the previously discussed rRNA  
616 methyltransferase genes (Kole\_1718 and Kole\_0897). The fatty acid synthesis genes (Kole\_0969 -  
617 Kole\_0973) that are up-regulated at 40°C, as well as their Kosmotogales homologs, form a distantly  
618 related sister clade to other Thermotogae lineages (Figure S6A), suggesting that these genes may  
619 have been acquired from an un-sampled lineage. Similarly, the Csp-encoding gene highly expressed  
620 at 30°C (Kole\_0109) is placed outside of the Thermotogae clade (Figure S6B). Predicted acquisition  
621 of the fatty acid synthesis and *csp* genes by (now mesophilic) archaea (López-García et al., 2015)  
622 additionally argues for the importance of these genes in adaptation to low temperature growth.

623 It is notable that some putative lateral gene acquisitions by *K. olearia* do not have homologs  
624 in *Mesotoga*. These include genes encoding the predicted cold temperature sensor (Kole\_1015 -  
625 Kole\_1017), one of the PPIase genes (Kole\_1745), as well as the canonical cold response enzyme  
626 DEAD/DEAH box RNA helicase (Kole\_0922). Absence of these genes in *Mesotoga* suggests their  
627 potential importance for *K. olearia*'s ability to grow over a wide temperature range.  
628

### 629 3.9 Role of gene family expansion and lineage-specific gene evolution in thermoadaptation

630 Expansion of cold-responsive gene families may represent a common strategy for low temperature  
631 adaptation, as has been noted in many bacteria, especially in psychrophiles (e.g. Piette et al., 2010).  
632 *K. olearia* exhibits the same trend. For example, when compared to other Thermotogae, all three  
633 analyzed *Kosmotoga* genomes harboured more copies of Csp-encoding genes (Table S9 in Dataset  
634 S1). Additionally, *K. olearia* has extra homologs (Kole\_0111 and Kole\_0110) of the putative cold  
635 sensor system discussed above. The observed gene family expansions might be important not only  
636 for low temperature growth, but also for growth over a wide temperature interval. For example,  
637 *Mesotoga* functions with only a single *csp* gene, demonstrating that having more copies of this gene  
638 is not required for low temperature growth. Having several versions of these genes could, however,  
639 have made differential regulation easier. Similarly, the additional homologs of the two-component  
640 cold sensor genes do not show coordinated temperature responses: Kole\_0110 is up-regulated at  
641 40°C, while Kole\_0111 is up-regulated at 77°C (Table 1). Therefore, these additional homologs may  
642 encode sensors tuned to different temperatures.

643 Gene family expansions can be achieved via within-lineage gene duplication or through LGT.  
644 A combination of these mechanisms appears to be at work in *K. olearia*, as demonstrated by the  
645 phylogenetic analyses of *csp* genes (Figure S6B). Similarly, even though several Thermotogae  
646 genomes contain as many copies of PPIase genes as do *Kosmotoga* genomes (Table S9 in Dataset  
647 S1), phylogenetic analysis suggests that in the Kosmotogales this gene family has only recently been  
648 expanded by both LGT (the FKBP-type, Table 1) and duplication (the PpiC-type, Figure S6C).

649 However, the role of within-lineage evolution of specific genes in response to changing  
650 environmental conditions should not be neglected. For example, typical cold response genes *rbfA*  
651 (Kole\_2103) and *nusA* (Kole\_1529) were not laterally acquired, but nevertheless show high  
652 expression only at 30°C. Deciphering adaptive changes that occurred in such genes compared to  
653 thermophilic homologs may elucidate molecular mechanisms of low temperature adaptation.  
654

### 655 3.10 Why maintain the capacity for growth over such a wide temperature range?

656 Most bacteria are under selection to eradicate extraneous DNA (and genes) from their genomes  
657 (Graur, 2016), and among free-living bacteria Thermotogae in general have very compact genomes.



## Temperature responses in *Kosmotoga olearia*

658 Kosmotogales, however, have notably larger genomes than other thermophilic Thermotogae (Pollo et  
659 al., 2015; Zhaxybayeva et al., 2012), raising the possibility that expanded genomes are advantageous  
660 in *K. olearia*'s habitat. As discussed above, many of the genes in *K. olearia*, such as the cold-sensor  
661 system, were expressed only at specific sub- or supra-optimal temperatures, but do not seem to be  
662 important for growth at other temperatures (Table 1 and Table S5 in Dataset S1). The regulated  
663 response to low temperatures and the preservation of the laterally acquired genes specifically  
664 expressed at 40°C and 30°C suggest that *K. olearia* encounters environments with very different  
665 temperatures frequently enough to maintain these genes in its genome. Such environments may  
666 include oil reservoirs located at different depths, as well as marine sediments influenced by the  
667 mixing of cold deep-sea water and hydrothermal fluids (Sievert and Vetriani, 2012). Perhaps, *K.*  
668 *olearia* migrates between such locations via subsurface fluids and, as a result, may have been  
669 selected to become a temperature generalist. This conjecture is supported by the environmental  
670 conditions of the subsurface environments and marine hydrothermal vents from which *Kosmotoga*  
671 spp. have been isolated (DiPippo et al., 2009; Nunoura et al., 2010; L'Haridon et al., 2014). *K.*  
672 *olearia* originated from a deep subsurface oil reservoir with *in situ* temperature of 68°C (DiPippo et  
673 al., 2009), but its 16S rRNA sequences have also been detected in many oil fields having *in situ*  
674 temperatures of 20°C–50°C (Nesbø et al., 2010). *Kosmotoga* sp. DU53, which is most similar to *K.*  
675 *olearia*, was isolated from an oil reservoir with an *in situ* temperature of ~50°C, while *K.*  
676 *arenicorallina* was obtained from hydrothermal sediments with a temperature of ~40°C (Nunoura et  
677 al., 2010). Notably, *K. olearia* was also identified as a major constituent of a metagenome from a  
678 deep subsurface oil reservoir with *in situ* temperature of 85°C and pressure of 25MPa (Kotlar et al.,  
679 2011). While the reservoir temperature is higher than the maximum *K. olearia* growth temperature  
680 reported here, elevated pressure could extend *K. olearia*'s temperature maximum, as has been  
681 demonstrated for some archaea (e.g. (Takai et al., 2008)). Therefore, *K. olearia*'s growth temperature  
682 range under natural conditions may be even broader than 20-79°C.

## 683 4 Conclusions.

684 The present study demonstrates that even bacteria with relatively small genomes can use  
685 transcriptional changes to respond effectively to large changes in temperature. We showed that *K.*  
686 *olearia*'s response to sustained exposure to a non-optimal temperature includes up-regulation of  
687 hundreds of genes. Several key genes with known temperature-related functions apparently have  
688 been acquired laterally, suggesting that LGT is an evolutionarily successful strategy for expansion of  
689 temperature tolerance. However, gene duplication and subsequent sub-functionalization of the  
690 paralogs likely also play an important adaptive role.

691 The ability of *K. olearia* to inhabit both high and low temperature environments suggests that  
692 members of this lineage encounter environments with large temperature fluctuations and/or migrate  
693 across ecological niches within the deep biosphere (e.g., between deep and shallow subsurface oil  
694 reservoirs). Therefore, the subsurface environments, as well as their microbial populations, might be  
695 viewed as a connected archipelago instead of isolated islands. As a corollary, we speculate that *K.*  
696 *olearia*-like ecological generalists could also facilitate LGT among seemingly isolated deep  
697 biosphere microbial communities adapted to a narrower ecological niche. For example, we have  
698 previously demonstrated high levels of gene flow among hyperthermophilic *Thermotoga* populations  
699 in subsurface oil reservoirs and marine hydrothermal vents (Nesbø et al., 2015), environments that  
700 are separated by non-thermophilic surroundings but are hydrologically linked. The mechanism of  
701 such gene flow is not yet known, but *K. olearia*-like Thermotogae capable of growing both in  
702 subsurface oil reservoirs and adjacent marine sediments could serve as mediators of gene exchange.

## Temperature responses in *Kosmotoga olearia*

703            Although some of the identified 573 temperature-responsive genes are already known to be  
704 expressed in bacteria and archaea grown at high or low temperatures, most of the up-regulated genes  
705 have not previously been implicated in temperature response and are in need of better functional and  
706 biochemical characterization. For example, the majority of the *K. olearia* genes responsive to  
707 elevated temperature encode proteins of unknown functions. Versatile proteins that work across a  
708 broad range of temperatures also warrant further biochemical and evolutionary analyses, as  
709 understanding of their enzymatic flexibility can aid the design of commercially important  
710 thermostable proteins. Finally, other regulatory mechanisms (e.g. DNA methylation, post-  
711 transcriptional modifications) not studied here may reveal additional proteins important in *K.*  
712 *olearia*'s temperature responses, and should be targeted in future studies.

713

### 714 **5 Conflict of Interest**

715 *The authors declare that the research was conducted in the absence of any commercial or financial*  
716 *relationships that could be construed as a potential conflict of interest.*

717

### 718 **6 Author Contributions**

719 SP, JF, OZ, CN designed research. SP, JF and CN managed the project. SP performed the RNA-Seq  
720 experiments and data analyses. AA performed the fatty acid analyses and interpreted the data. TS  
721 carried out the HGTector analyses. CN and SP did the comparative genomic analyses. CN did the  
722 phylogenetic analyses and ANCOVA analyses of the RNA-Seq data. SP, OZ, JF and CN interpreted  
723 all data. SP, OZ, and CN wrote the paper. All authors reviewed, revised and approved the final  
724 manuscript.

725

### 726 **7 Funding**

727 This work was supported by a Research council of Norway award (project no. 180444/V40) to  
728 C.L.N.; a Simons Investigator award from the Simons Foundation, a Dartmouth College Walter and  
729 Constance Burke Research Initiation Award, and Dartmouth College start-up funds to O.Z.; and an  
730 NSERC Alexander Graham Bell Canada Graduate Scholarship CGS-M to S.M.J.P. The funders had  
731 no role in study design, data collection and interpretation, or the decision to submit the work for  
732 publication.

733

### 734 **8 Acknowledgments**

735 We thank Rhianna Charchuk for technical assistance, Dr. Amanda J. Lohan for advice and discussion  
736 of RNA-Seq methodology, Dr. Karen Budwill for head-space gas analyses, and Jennifer Franks for  
737 initial discussions of lateral gene transfer detection methods.

738

## Temperature responses in *Kosmotoga olearia*

### 739 9 References

- 740 Akanuma, G., Nanamiya, H., Natori, Y., Yano, K., Suzuki, S., Omata, S., et al. (2012). Inactivation  
741 of ribosomal protein genes in *Bacillus subtilis* reveals importance of each ribosomal protein for cell  
742 proliferation and cell differentiation. *J. Bacteriol.* 194, 6282-6291. doi: 10.1128/JB.01544-12.
- 743 Akanuma, G., Kobayashi, A., Suzuki, S., Kawamura, F., Shiwa, Y., Watanabe, S., et al. (2014).  
744 Defect in the formation of 70S ribosomes caused by lack of ribosomal protein L34 can be suppressed  
745 by magnesium. *J. Bacteriol.* 196, 3820-3830. doi: 10.1128/JB.01896-14.
- 746 Alreshidi, M. M., Dunstan, R. H., Macdonald, M. M., Smith, N. D., Gottfries, J., and Roberts, T. K.  
747 (2015). Metabolomic and proteomic responses of *Staphylococcus aureus* to prolonged cold stress  
748 121, 44-55. doi: 10.1016/j.jprot.2015.03.010.
- 749 Altschul, S. F., Madden, T. L., Schäffer, A. A., Zhang, J., Zhang, Z., Miller, W., et al. (1997).  
750 Gapped BLAST and PSI-BLAST: a new generation of protein database search programs. *Nucleic  
751 Acids Res.* 25, 3389-3402. doi: 10.1093/nar/25.17.3389.
- 752 Baldrige, K. C., and Contreras, L. M. (2014). Functional implications of ribosomal RNA  
753 methylation in response to environmental stress. *Crit. Rev. Biochem. Mol. Biol.* 49, 69-89. doi:  
754 10.3109/10409238.2013.859229.
- 755 Balleza, E., López-Bojorquez, L. N., Martínez-Antonio, A., Resendis-Antonio, O., Lozada-Chávez,  
756 I., Balderas-Martínez, Y. I., et al. (2009). Regulation by transcription factors in bacteria: beyond  
757 description. *FEMS Microbiol. Rev.* 33, 133-151. doi: 10.1111/j.1574-6976.2008.00145.x.
- 758 Barria, C., Malecki, M., and Arraiano, C. M. (2013). Bacterial adaptation to cold. *Microbiology* 159,  
759 2437-2443. doi: 10.1099/mic.0.052209-0.
- 760 Bhavsar, R. B., Makley, L. N., and Tsonis, P. A. (2010). The other lives of ribosomal proteins 4, 327-  
761 344. doi: 10.1186/1479-7364-4-5-327.
- 762 Boonyaratanakornkit, B. B., Simpson, A. J., Whitehead, T. A., Fraser, C. M., El-Sayed, N. M. A.,  
763 and Clark, D. S. (2005). Transcriptional profiling of the hyperthermophilic methanarchaeon  
764 *Methanococcus jannaschii* in response to lethal heat and non-lethal cold shock. *Environ. Microbiol.*  
765 7, 789-797. doi: 10.1111/j.1462-2920.2005.00751.x.
- 766 Boucher, Y., Douady, C. J., Papke, R. T., Walsh, D. A., Boudreau, M. E. R., Nesbø, C. L., et al.  
767 (2003). Lateral gene transfer and the origins of prokaryotic groups. *Annu. Rev. Genet.* 37, 283-328.  
768 doi: 10.1146/annurev.genet.37.050503.084247.
- 769 Buck, M., Gallegos, M., Studholme, D. J., Guo, Y., and Gralla, J. D. (2000). The bacterial enhancer-  
770 dependent  $\sigma^{54}$  ( $\sigma^N$ ) transcription factor  
771 . *J. Bacteriol.* 182, 4129-4136. doi: 10.1128/JB.182.15.4129-4136.2000.Updated.

## Temperature responses in *Kosmotoga olearia*

- 772 Caspi, R., Altman, T., Billington, R., Dreher, K., Foerster, H., Fulcher, C. A., et al. (2014). The  
773 MetaCyc database of metabolic pathways and enzymes and the BioCyc collection of  
774 pathway/genome databases. *Nucleic Acids Res.* 42, D459-D471. doi: 10.1093/nar/gkt1103.
- 775 Cho, B., Zengler, K., Qiu, Y., Park, Y. S., Knight, E. M., Barrett, C. L., et al. (2009). The  
776 transcription unit architecture of the *Escherichia coli* genome. *Nat. Biotechnol.* 27, 1043-1049. doi:  
777 10.1038/nbt.1582.
- 778 Dahlsten, E., Isokallio, M., Somervuo, P., Lindström, M., and Korkeala, H. (2014). Transcriptomic  
779 analysis of (group I) *Clostridium botulinum* ATCC 3502 cold shock response 9, e89958. doi:  
780 10.1371/journal.pone.0089958.
- 781 de Mendoza, D. (2014). Temperature sensing by membranes. *Annu. Rev. Microbiol.* 68, 101-116.  
782 doi: 10.1146/annurev-micro-091313-103612.
- 783 Dinsdale, A. E., Halket, G., Coorevits, A., van Landschoot, A., Busse, H. J., de Vos, P., et al. (2011).  
784 Emended descriptions of *Geobacillus thermoleovorans* and *Geobacillus thermocatenuatus*. *Int. J.*  
785 *Syst. Evol. Microbiol.* 61, 1802-1810. doi: 10.1099/ijs.0.025445-0.
- 786 DiPippo, J. L., Nesbø, C. L., Dahle, H., Doolittle, W. F., Birkland, N., and Noll, K. M. (2009).  
787 *Kosmotoga olearia* gen. nov., sp. nov., a thermophilic, anaerobic heterotroph isolated from an oil  
788 production fluid. *Int. J. Syst. Evol. Microbiol.* 59, 2991-3000. doi: 10.1099/ijs.0.008045-0.
- 789 Dray, S., Dufour, A. B., and Chessel, D. (2007). The ade4 Package - II : Two-table and K-table  
790 methods 7, 47-52. doi: 10.1159/000323281.
- 791 Faria, J. C., Demétrio, C. G. B., and Allaman, I. B. (2013). *bpca: Biplot of multivariate data based*  
792 *on principal components analysis*. Ilheus, Bahia, Brasil and Piracicaba, Sao Paulo, Brasil: UESC and  
793 ESALQ.
- 794 Foster, P. L. (2007). Stress-induced mutagenesis in bacteria. *Crit Rev Biochem Mol Biol.* 42, 373-  
795 397. doi: 10.1080/10409230701648494.Stress-Induced.
- 796 Fox, G. E. (2010). "Origin and evolution of the ribosome," in *The Origins of Life*, eds. D. Deamer,  
797 and J. W. Szostak: Cold Spring Harb Perspect Biol), 2:a003483.
- 798 Galperin, M. Y., Makarova, K. S., Wolf, Y. I., and Koonin, E. V. (2015). Expanded microbial  
799 genome coverage and improved protein family annotation in the COG database. *Nucleic Acids Res.*  
800 43, D261-D269. doi: 10.1093/nar/gku1223.
- 801 Ghobakhlou, A., Johnston, A., Harris, L., Antoun, H., and Laberge, S. (2015). Microarray  
802 transcriptional profiling of Arctic *Mesorhizobium* strain N33 at low temperature provides insights  
803 into cold adaption strategies. *BMC Genomics* 16, 383-396. doi: 10.1186/s12864-015-1611-4.
- 804 Godin-Roulling, A., Schmidpeter, P. A. M., Schmid, F. X., and Feller, G. (2015). Functional  
805 adaptations of the bacterial chaperone trigger factor to extreme environmental temperatures. *Environ.*  
806 *Microbiol.* 17, 2407-2420. doi: 10.1111/1462-2920.12707.

## Temperature responses in *Kosmotoga olearia*

- 807 Godovikova, V., Wang, H. T., Goetting-Minesky, M. P., Ning, Y., Capone, R. F., Slater, C. K., et al.  
808 (2010). *Treponema denticola* PrcB is required for expression and activity of the PrcA-PrtP  
809 (dentilisin) complex. *J. Bacteriol.* 192, 3337-3344. doi: 10.1128/JB.00274-10.
- 810 Goris, J., Konstantinidis, K. T., Klappenbach, J. A., Coenye, T., Vandamme, P., and Tiedje, J. M.  
811 (2007). DNA-DNA hybridization values and their relationship to whole-genome sequence  
812 similarities. *Int. J. Syst. Evol. Microbiol.* 57, 81-91. doi: 10.1099/ijs.0.64483-0.
- 813 Graur, D. (2016). "Prokaryotic Genome Evolution," in *Molecular and Genome Evolution* Anonymous  
814 (Sunderland, MA: Sinauer Associates), 451.
- 815 Guckert, J. B., Antworth, C. P., Nichols, P. D., and White, D. C. (1985). Phospholipid, ester-linked  
816 fatty acid profiles as reproducible assays for changes in prokaryotic community structure of estuarine  
817 sediments. *FEMS Microbiol. Lett.* 31, 147-158. doi: 10.1016/0378-1097(85)90016-3.
- 818 Haas, B. J., Chin, M., Nusbaum, C., Birren, B. W., and Livny, J. (2012). How deep is deep enough  
819 for RNA-Seq profiling of bacterial transcriptomes?. *BMC Genomics* 13, 734-745. doi: 10.1186/1471-  
820 2164-13-734.
- 821 Kanehisa, M., Goto, S., Sato, Y., Kawashima, M., Furumichi, M., and Tanabe, M. (2014). Data,  
822 information, knowledge and principle: back to metabolism in KEGG. *Nucleic Acids Res.* 42, D199-  
823 D205. doi: 10.1093/nar/gkt1076.
- 824 Katoh, K., Misawa, K., Kuma, K., and Miyata, T. (2002). MAFFT: a novel method for rapid multiple  
825 sequence alignment based on fast Fourier transform. *Nucleic Acids Res.* 30, 3059-3066. doi:  
826 10.1093/nar/gkf436.
- 827 Kotlar, H. K., Lewin, A., Johansen, J., Throne-Holst, M., Haverkamp, T., Markussen, S., et al.  
828 (2011). High coverage sequencing of DNA from microorganisms living in an oil reservoir 2.5  
829 kilometres subsurface 3, 674-681. doi: 10.1111/j.1758-2229.2011.00279.x.
- 830 Latif, H., Lerman, J. A., Portnoy, V. A., Tarasova, Y., Nagarajan, H., Schrimpe-Rutledge, A. C., et  
831 al. (2013). The genome organization of *Thermotoga maritima* reflects its lifestyle 9, e1003485. doi:  
832 10.1371/journal.pgen.1003485.
- 833 L'Haridon, S., Jiang, L., Alain, K., Chalopin, M., Rouxel, O., Beauverger, M., et al. (2014).  
834 *Kosmotoga pacifica* sp. nov., a thermophilic chemoorganoheterotrophic bacterium isolated from an  
835 East Pacific hydrothermal sediment. *Extremophiles* 18, 81-88. doi: 10.1007/s00792-013-0596-7.
- 836 López-García, P., Zivanovic, Y., Deschamps, P., and Moreira, D. (2015). Bacterial gene import and  
837 mesophilic adaptation in archaea 13, 447-456. doi: 10.1038/nrmicro3485.
- 838 Makarova, K. S., Aravind, L., Wolf, Y. I., and Koonin, E. V. (2011). Unification of Cas protein  
839 families and a simple scenario for the origin and evolution of CRISPR-Cas systems. 6, 38-65. doi:  
840 10.1186/1745-6150-6-38.

## Temperature responses in *Kosmotoga olearia*

- 841 Markowitz, V. M., Chen, I. A., Palaniappan, K., Chu, K., Szeto, E., Pillay, M., et al. (2014). IMG 4  
842 version of the integrated microbial genomes comparative analysis system. *Nucleic Acids Res.* 42,  
843 D560-7. doi: 10.1093/nar/gkt963.
- 844 McClure, R., Balasubramanian, D., Sun, Y., Bobrovskyy, M., Sumbly, P., Genco, C. a., et al. (2013).  
845 Computational analysis of bacterial RNA-Seq data. *Nucleic Acids Res.* 41, e140. doi:  
846 10.1093/nar/gkt444.
- 847 Mega, R., Manzoku, M., Shinkai, A., Nakagawa, N., Kuramitsu, S., and Masui, R. (2010). Very rapid  
848 induction of a cold shock protein by temperature downshift in *Thermus thermophilus*. *Biochem.*  
849 *Biophys. Res. Commun.* 399, 336-340. doi: 10.1016/j.bbrc.2010.07.065.
- 850 Mykytczuk, N. C. S., Foote, S. J., Omelon, C. R., Southam, G., Greer, C. W., and Whyte, L. G.  
851 (2013). Bacterial growth at -15°C; molecular insights from the permafrost bacterium *Planococcus*  
852 *halocryophilus* Or1 7, 1211-1226. doi: 10.1038/ismej.2013.8.
- 853 Nanavati, D. M., Thirangoon, K., and Noll, K. M. (2006). Several archaeal homologs of putative  
854 oligopeptide-binding proteins encoded by *Thermotoga maritima* bind sugars. *Appl. Environ.*  
855 *Microbiol.* 72, 1336-1345. doi: 10.1128/AEM.72.2.1336-1345.2006.
- 856 Nesbø, C. L., Kumaraswamy, R., Dlutek, M., Doolittle, W. F., and Foght, J. (2010). Searching for  
857 mesophilic *Thermotogales* bacteria: "Mesotogas" in the wild. *Appl. Environ. Microbiol.* 76, 4896-  
858 4900. doi: 10.1128/AEM.02846-09.
- 859 Nesbø, C. L., Swithers, K. S., Dahle, H., Haverkamp, T. H., Birkeland, N., Sokolova, T., et al.  
860 (2015). Evidence for extensive gene flow and *Thermotoga* subpopulations in subsurface and marine  
861 environments 9, 1532-1542. doi: 10.1038/ismej.2014.238.
- 862 Nunoura, T., Hirai, M., Imachi, H., Miyazaki, M., Makita, H., Hirayama, H., et al. (2010).  
863 *Kosmotoga arenicorallina* sp. nov. a thermophilic and obligately anaerobic heterotroph isolated from  
864 a shallow hydrothermal system occurring within a coral reef, southern part of the Yaeyama  
865 Archipelago, Japan, reclassification of *Thermococoides shengliensis* as *Kosmotoga*  
866 *shengliensis* comb. nov., and emended description of the genus *Kosmotoga*. *Arch. Microbiol.* 192,  
867 811-819. doi: 10.1007/s00203-010-0611-7.
- 868 Phadtare, S. (2004). Recent developments in bacterial cold-shock response. *Curr. Issues Mol. Biol.* 6,  
869 125-136.
- 870 Phadtare, S., Hwang, J., Severinov, K., and Inouye, M. (2003). CspB and CspL, thermostable cold-  
871 shock proteins from *Thermotoga maritima* 8, 801-810. doi: 10.1046/j.1365-2443.2003.00675.x.
- 872 Piette, F., D'Amico, S., Struvay, C., Mazzucchelli, G., Renaut, J., Tutino, M. L., et al. (2010).  
873 Proteomics of life at low temperatures: trigger factor is the primary chaperone in the Antarctic  
874 bacterium *Pseudoalteromonas haloplanktis* TAC125. *Mol. Microbiol.* 76, 120-132. doi:  
875 10.1111/j.1365-2958.2010.07084.x.

## Temperature responses in *Kosmotoga olearia*

- 876 Pollo, S. M. J., Charchuk, R., and Nesbø, C. L. (2016). Draft genome sequences of *Kosmotoga* sp.  
877 DU53 and *Kosmotoga arenicorallina* S304. *GenomeA*, in press.
- 878 Pollo, S. M. J., Zhaxybayeva, O., and Nesbø, C. L. (2015). Insights into thermoadaptation and the  
879 evolution of mesophily from the bacterial phylum *Thermotogae*. *Can. J. Microbiol.* 61, 655-670.
- 880 Pysz, M. A., Ward, D. E., Shockley, K. R., Montero, C. I., Connors, S. B., Johnson, M. R., et al.  
881 (2004). Transcriptional analysis of dynamic heat-shock response by the hyperthermophilic bacterium  
882 *Thermotoga maritima*. *Extremophiles* 8, 209-217. doi: 10.1007/s00792-004-0379-2.
- 883 Qiu, Y., Cho, B. K., Park, Y. S., Lovley, D., Palsson, B., and Zengler, K. (2010). Structural and  
884 operational complexity of the *Geobacter sulfurreducens* genome. *Genome Res.* 20, 1304-1311. doi:  
885 10.1101/gr.107540.110.
- 886 Raghubeer, E. V., and Matches, J. R. (1990). Temperature range for growth of *Escherichia*  
887 *coli* serotype 0157:H7 and selected coliforms in *E. coli* medium. *J. Clin. Microbiol.* 28, 803-805.
- 888 Ratkowsky, D. A., Lowry, R. K., McMeekin, T. A., Stokes, A. N., and Chandler, R. E. (1983).  
889 Model for bacterial culture growth rate throughout the entire biokinetic temperature range. *J.*  
890 *Bacteriol.* 154, 1222-1226.
- 891 Robinson, M. D., and Smyth, G. K. (2008). Small-sample estimation of negative binomial dispersion,  
892 with applications to SAGE data 9, 321-332. doi: 10.1093/biostatistics/kxm030.
- 893 Rodriguez-R, L. M., and Konstantinidis, K. T. (2016). The enveomics collection: a toolbox for  
894 specialized analyses of microbial genomes and metagenomes 4, e19001.
- 895 Schumann, W. (2009). Temperature sensors of eubacteria. *Advances in applied microbiology* 67,  
896 213-256. doi: 10.1016/S0065-2164(08)01007-1.
- 897 Schut, G. J., Boyd, E. S., Peters, J. W., and Adams, M. W. W. (2012). The modular respiratory  
898 complexes involved in hydrogen and sulfur metabolism by heterotrophic hyperthermophilic archaea  
899 and their evolutionary implications. *FEMS Microbiol. Rev.* 37, 182-203. doi: 10.1111/j.1574-  
900 6976.2012.00346.x.
- 901 Sievert, S., and Vetriani, C. (2012). Chemoautotrophy at Deep-Sea Vents: Past, Present, and Future.  
902 *Oceanography* 25, 218-233. doi: 10.5670/oceanog.2012.21.
- 903 Stamatakis, A. (2006). RAxML-VI-HPC: Maximum likelihood-based phylogenetic analyses with  
904 thousands of taxa and mixed models. *Bioinformatics* 22, 2688-2690. doi:  
905 10.1093/bioinformatics/btl446.
- 906 Swinnen, I. A. M., Bernaerts, K., Dens, E. J. J., Geeraerd, A. H., and Van Impe J. F. (2004).  
907 Predictive modelling of the microbial lag phase: A review. *Int. J. Food Microbiol.* 94, 137-159. doi:  
908 10.1016/j.ijfoodmicro.2004.01.006.

## Temperature responses in *Kosmotoga olearia*

- 909 Swithers, K. S., DiPippo, J. L., Bruce, D. C., Detter, C., Tapia, R., Han, S., et al. (2011). Genome  
910 sequence of *Kosmotoga olearia* strain TBF 19.5.1, a thermophilic bacterium with a wide growth  
911 temperature range, isolated from the Troll B oil platform in the North Sea. *J. Bacteriol.* 193, 5566-  
912 5567. doi: 10.1128/JB.05828-11.
- 913 Takai, K., Nakamura, K., Toki, T., Tsunogai, U., Miyazaki, M., Miyazaki, J., et al. (2008). Cell  
914 proliferation at 122°C and isotopically heavy CH<sub>4</sub> production by a hyperthermophilic methanogen  
915 under high-pressure cultivation. *Proc. Natl. Acad. Sci. U. S. A.* 105, 10949-10954. doi:  
916 10.1073/pnas.0712334105.
- 917 Wang, Z., Tong, W., Wang, Q., Bai, X., Chen, Z., Zhao, J., et al. (2012). The temperature dependent  
918 proteomic analysis of *Thermotoga maritima* 7, e46463. doi: 10.1371/journal.pone.0046463.
- 919 Zhaxybayeva, O., Swithers, K. S., Foght, J., Green, A. G., Bruce, D., Detter, C., et al. (2012).  
920 Genome sequence of the mesophilic Thermotogales bacterium *Mesotoga prima* MesG1.Ag.4.2  
921 reveals the largest Thermotogales genome to date. *Genome Biol. Evol.* 4, 700-708. doi:  
922 10.1093/gbe/evs059.
- 923 Zhaxybayeva, O., Swithers, K. S., Lapierre, P., Fournier, G. P., Bickhart, D. M., DeBoy, R. T., et al.  
924 (2009). On the chimeric nature, thermophilic origin, and phylogenetic placement of the  
925 *Thermotogales*. *Proc. Natl. Acad. Sci. U. S. A.* 106, 5865-5870. doi: 10.1073/pnas.0901260106.
- 926 Zhu, Q., Kosoy, M., and Dittmar, K. (2014). HGTector: An automated method facilitating genome-  
927 wide discovery of putative horizontal gene transfers. *BMC Genomics* 15, 717. doi: 10.1186/1471-  
928 2164-15-717.
- 929



## Temperature responses in *Kosmotoga olearia*

930 **TABLE 1. Gene expression in selected laterally acquired temperature-responsive genes.** At each  
 931 temperature, the listed RPKM values represent the average expression levels across replicates.  
 932 Values that are significantly different from 65°C are shown in bold font. None of the temperature  
 933 responsive expression patterns show significant effect of growth rate and, where tested (i.e.  $R > 0.7$ ),  
 934 the growth-rate-only model was rejected.

| Locus Tag | Functional annotation                               | RPKM values       |             |      |            | Identified by                      |
|-----------|-----------------------------------------------------|-------------------|-------------|------|------------|------------------------------------|
|           |                                                     | 30°C <sup>a</sup> | 40°C        | 65°C | 77°C       |                                    |
| Kole_0109 | Cold shock protein                                  | <b>5602</b>       | <b>892</b>  | 222  | 119        | Phylogenetic analysis <sup>a</sup> |
| Kole_0110 | Histidine kinase                                    | 175               | <b>333</b>  | 144  | 312        | Phylogenetic analysis              |
| Kole_0111 | Response regulator                                  | 166               | 204         | 173  | <b>446</b> | HGTector                           |
| Kole_0505 | Glycerol dehydrogenase                              | 721               | <b>2668</b> | 752  | 1242       | HGTector                           |
| Kole_0506 | Hypothetical protein                                | 559               | <b>2037</b> | 461  | 783        | Phylogenetic analysis              |
| Kole_0507 | Hypothetical protein                                | 555               | <b>2193</b> | 521  | 809        | HGTector                           |
| Kole_0508 | Poly (3-hydroxybutyrate) depolymerase-like protein  | 212               | 423         | 200  | 314        | HGTector                           |
| Kole_0897 | Ribosomal RNA methyltransferase, rmlL               | <b>503</b>        | 498         | 228  | 232        | HGTector                           |
| Kole_0922 | DEAD/DEAH box helicase                              | <b>755</b>        | <b>288</b>  | 89   | 102        | HGTector                           |
| Kole_0969 | 3-oxoacyl-ACP synthase III, FabH                    | <b>2386</b>       | <b>3063</b> | 939  | 1424       | HGTector                           |
| Kole_0970 | enoyl-ACP reductase II, fabK                        | 2226              | 3243        | 1486 | 1641       | HGTector <sup>a</sup>              |
| Kole_0971 | malonyl CoA-acyl carrier protein transacylase, fabD | 2304              | 4211        | 2303 | 2647       | HGTector                           |
| Kole_0972 | acyl carrier protein                                | 6531              | 12601       | 4850 | 4241       | HGTector                           |
| Kole_0973 | 3-oxoacyl-ACP synthase II, fabF                     | 4815              | 9257        | 4753 | 4498       | HGTector                           |
| Kole_1015 | Response regulator                                  | <b>1289</b>       | <b>515</b>  | 95   | 130        | HGTector                           |
| Kole_1016 | Response regulator                                  | <b>783</b>        | <b>280</b>  | 54   | 72         | HGTector                           |
| Kole_1017 | Histidine kinase                                    | <b>697</b>        | <b>275</b>  | 59   | 90         | Phylogenetic analysis              |
| Kole_1718 | Ribosomal RNA methyltransferase, rmlH               | <b>531</b>        | 332         | 211  | 203        | HGTector                           |
| Kole_1745 | PPIase FKBP-type                                    | 2783              | 2382        | 1541 | <b>430</b> | HGTector                           |

935 a) Phylogenetic tree is shown in Supplemental Figure 6.

## Temperature responses in *Kosmotoga olearia*

### 936 **Figure Legends:**

937 **FIGURE 1. Growth rate of *K. olearia* as a function of temperature.** Isothermic growth curves  
938 were generated at each temperature from an inoculum grown at that temperature for at least three  
939 transfers (except for 25°C and 80°C, for which an inoculum from the same temperature could not be  
940 generated; see materials and methods). Up-shifted and down-shifted growth curves were generated  
941 from an inoculum that was grown at lower and higher temperatures, respectively. Red squares,  
942 growth temperature up-shifted from 65°C to 77°C or from 40°C to 65°C; Blue circles, growth  
943 temperature down-shifted from 77°C to 65°C, 65°C to 40°C, or 40°C to 30°C. Data points represent  
944 the mean of replicate cultures (see materials and methods); error bars represent standard error.

945

946 **FIGURE 2. Model of energy generation pathway in *K. olearia* during growth on pyruvate.** The  
947 model includes genes likely involved in conversion of pyruvate to acetate, CO<sub>2</sub>, H<sub>2</sub>, and ATP. The  
948 genes were selected from the list of genes highly expressed across all temperature conditions (Table  
949 S3 in Dataset S1). Acetate transport is not shown. The dashed box indicates hydrogenase activity.  
950 The two highly expressed hydrogenases are shown, but their potential interactions with each other or  
951 with the membrane are not known. Increased expression of citrate synthase at low temperature,  
952 which could redirect acetyl-CoA away from acetate production, is shown in grey. The inclusion of  
953 the ABC transporter is based on its high expression level but experiments are needed to confirm its  
954 involvement in pyruvate transport. The model also explains the observed lower ratio of carbon  
955 dioxide to hydrogen produced by growth on maltose vs. pyruvate (not shown), because during  
956 growth on maltose reduced electron carriers would be generated from the conversions of maltose to  
957 pyruvate.

958

959 **FIGURE 3. Biplot of the principal component analysis of 12 transcriptomes.** Each transcriptome  
960 is denoted by a point and genes are represented by vectors. Genes that point into a specific  
961 "temperature quadrant" are up-regulated at the growth temperature(s) of that quadrant, and the five  
962 longest (i.e., most highly correlated) gene vectors pointing to each quadrant are shown. Co-ordinates  
963 and vector length for all genes can be found in Table S4 in Dataset S1. It should be noted that the *ffs*  
964 (*Kole\_R0010*) transcript is only 115 nt, and may not have been fully represented in every  
965 transcriptome due to our isolation protocol which selects against small RNA (<200 nucleotides).  
966 Also, the high expression of the alcohol dehydrogenase (*Kole\_0742*) is probably due to the addition  
967 of stop solution before RNA isolation (see Text S1).

968

969 **FIGURE 4. Difference between observed and expected number of temperature responsive**  
970 **genes across functional categories.** Functional categories were assigned using the Clusters of  
971 Orthologous Groups (COG) database as implemented in IMG (Markowitz et al., 2014) and are  
972 denoted by one-letter abbreviations along the X-axis (see Figure S3 legend for notations). NC, for  
973 "no category", denotes genes not assigned to a functional category. For each temperature treatment  
974 (30°C, 40°C and 77°C) only the temperature-responsive fraction of the *K. olearia* genome was  
975 considered. If the temperature-responsive genes were randomly distributed across functional  
976 categories we would expect the same fraction of temperature-responsive genes in each COG

## Temperature responses in *Kosmotoga olearia*

977 category. The difference (in percent) between the observed and expected number of temperature  
978 responsive genes is plotted on the Y-axis with positive and negative values referring to over- and  
979 under-representation of the temperature-responsive genes, respectively. For actual numbers of genes  
980 in each COG category see Figure S3.

981

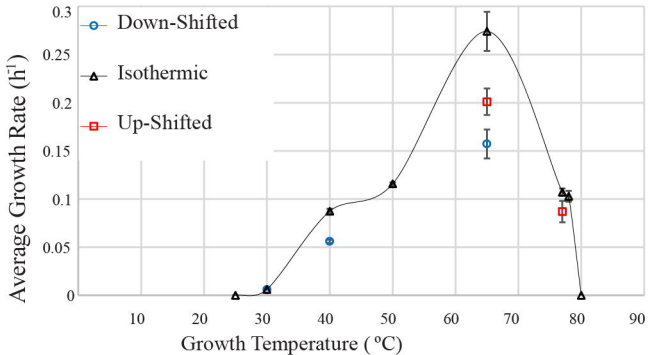

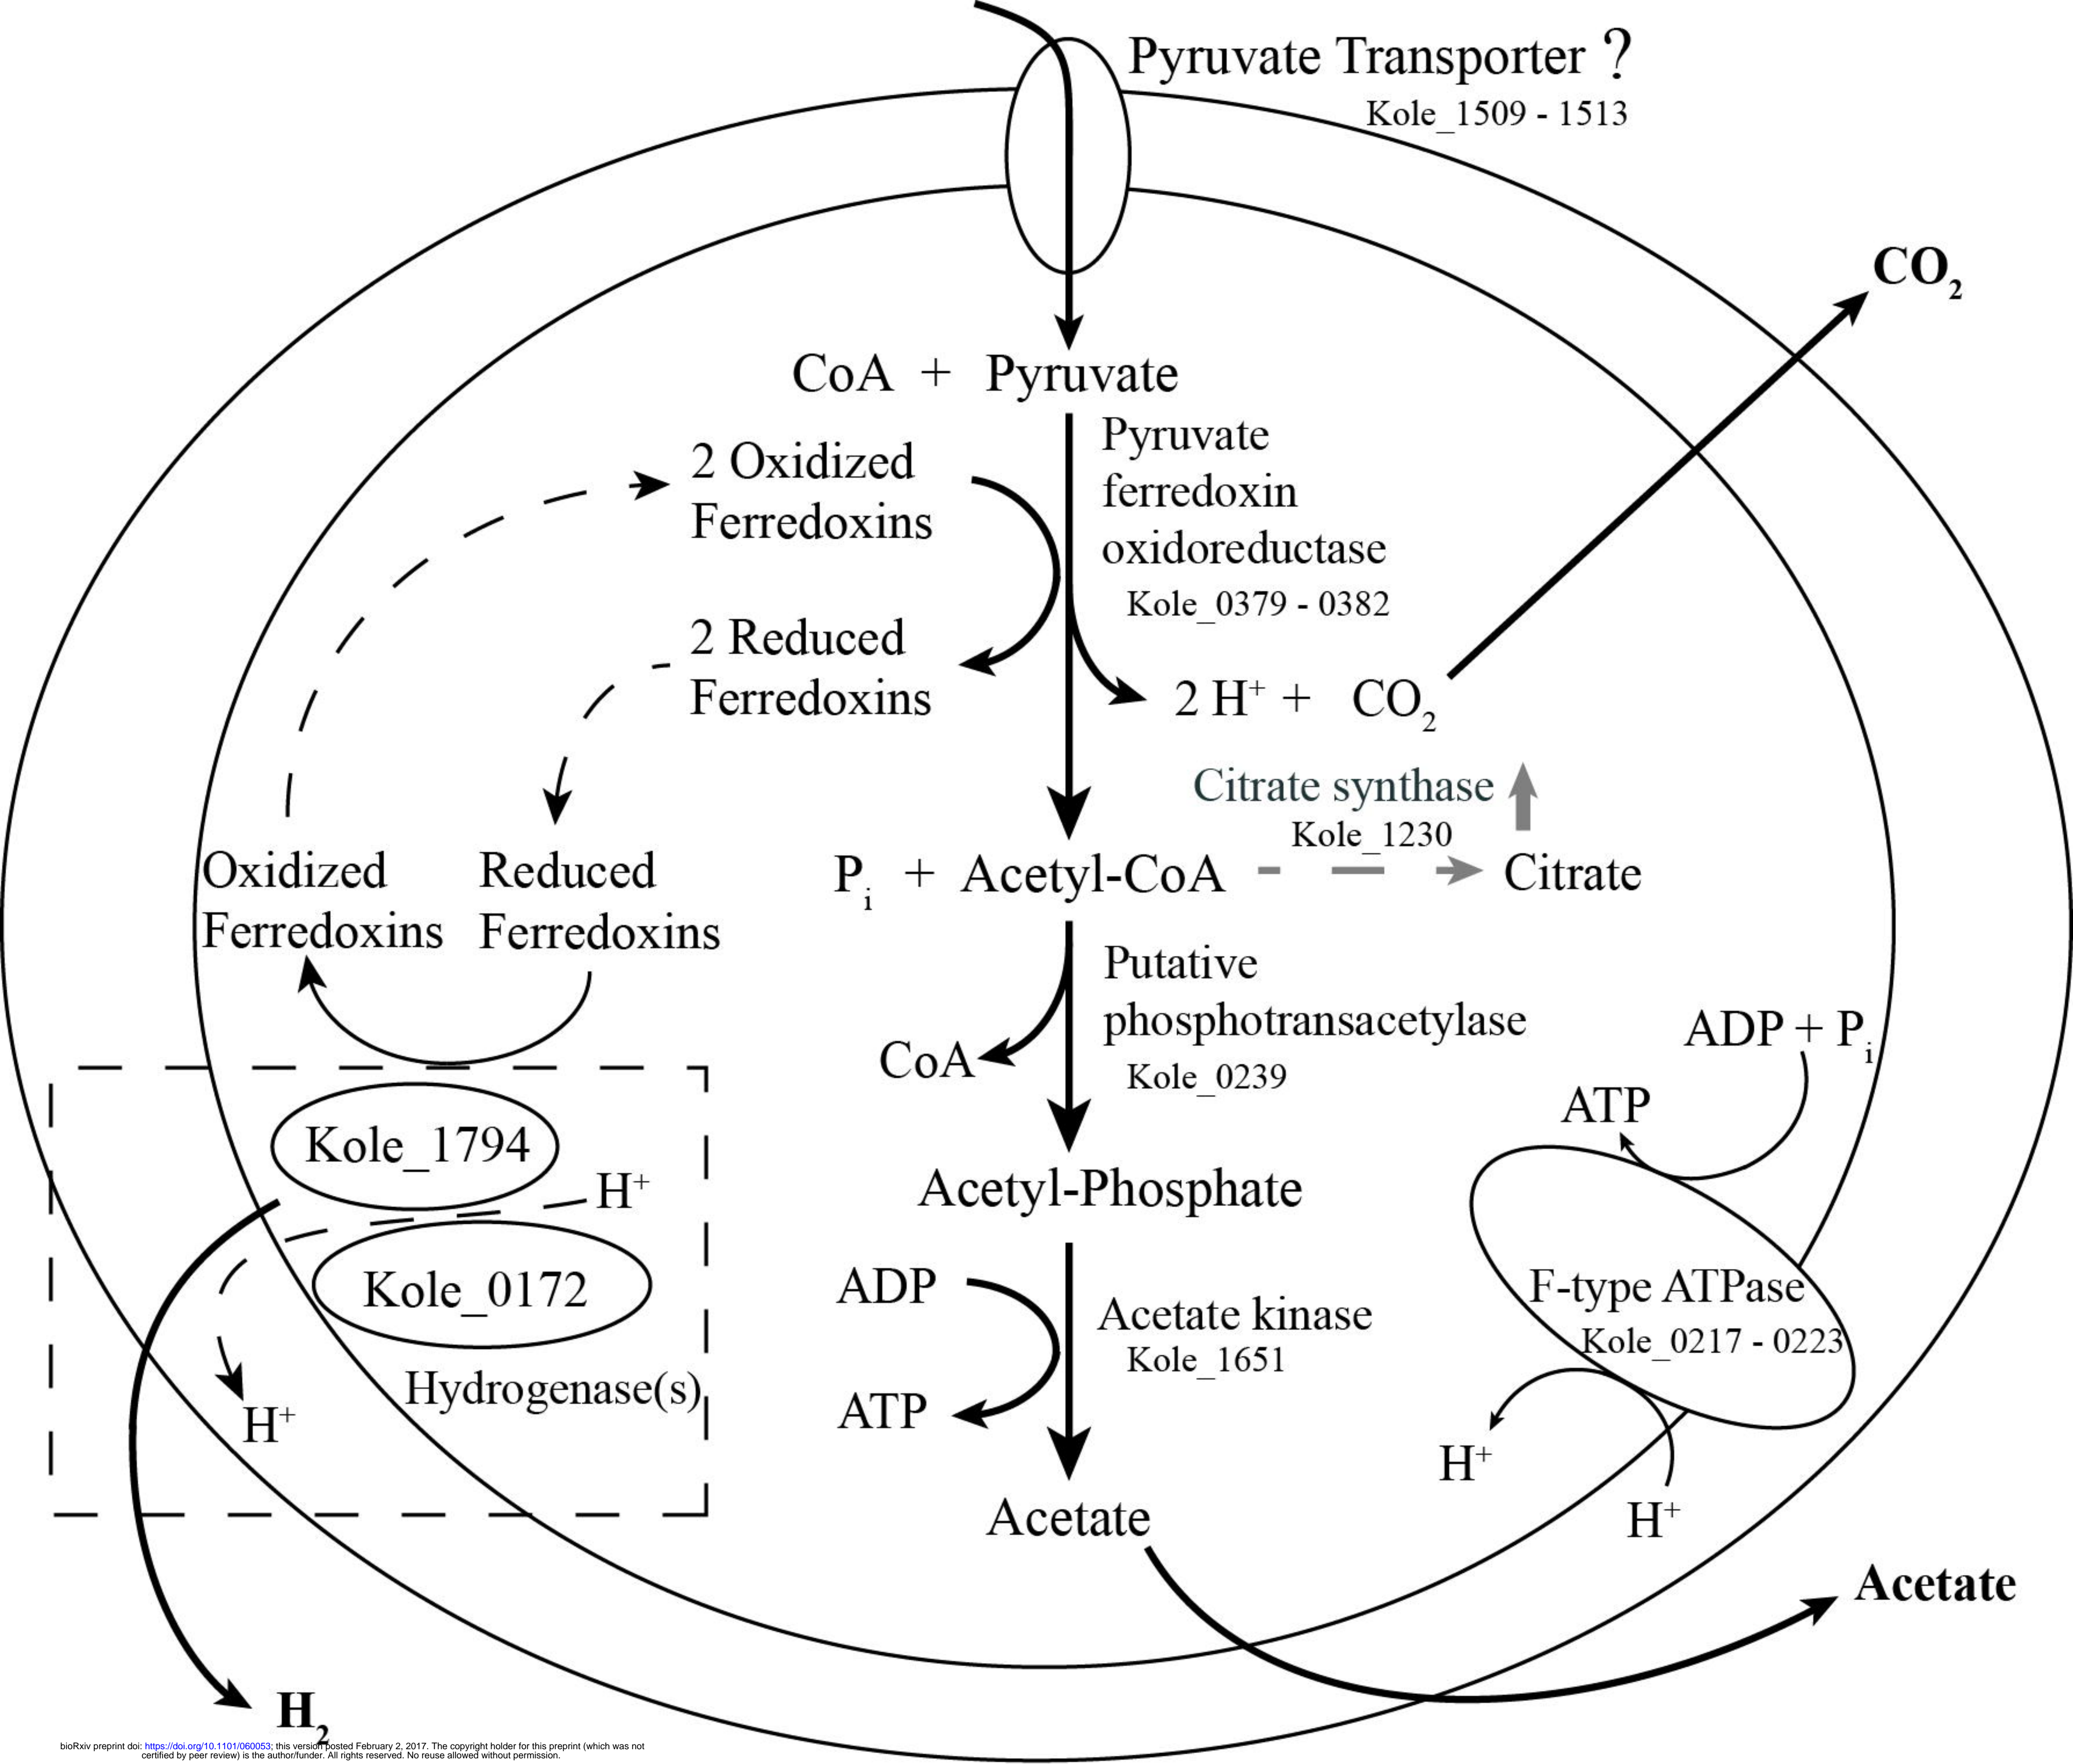

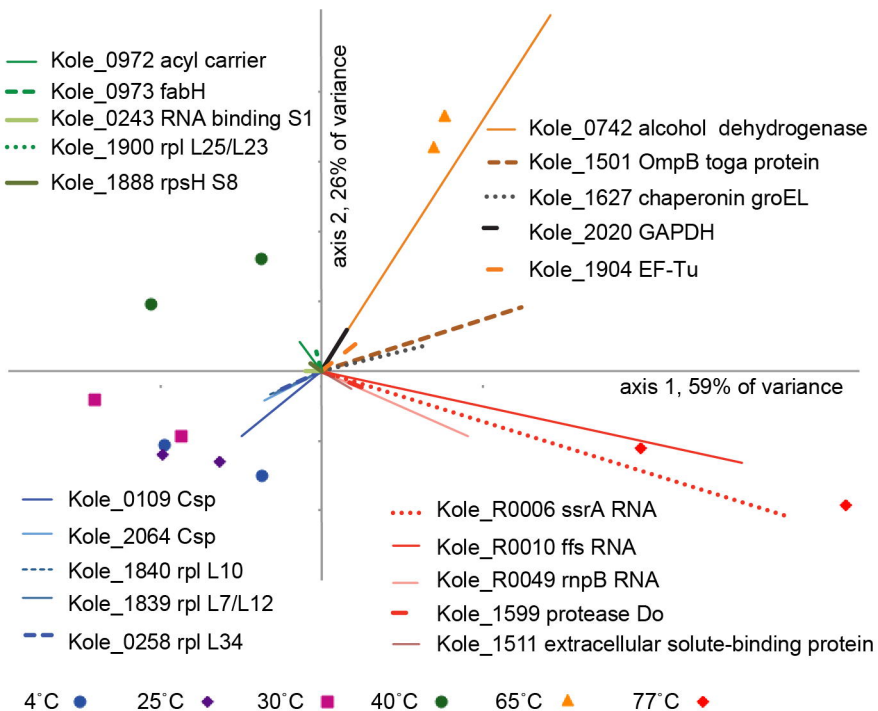

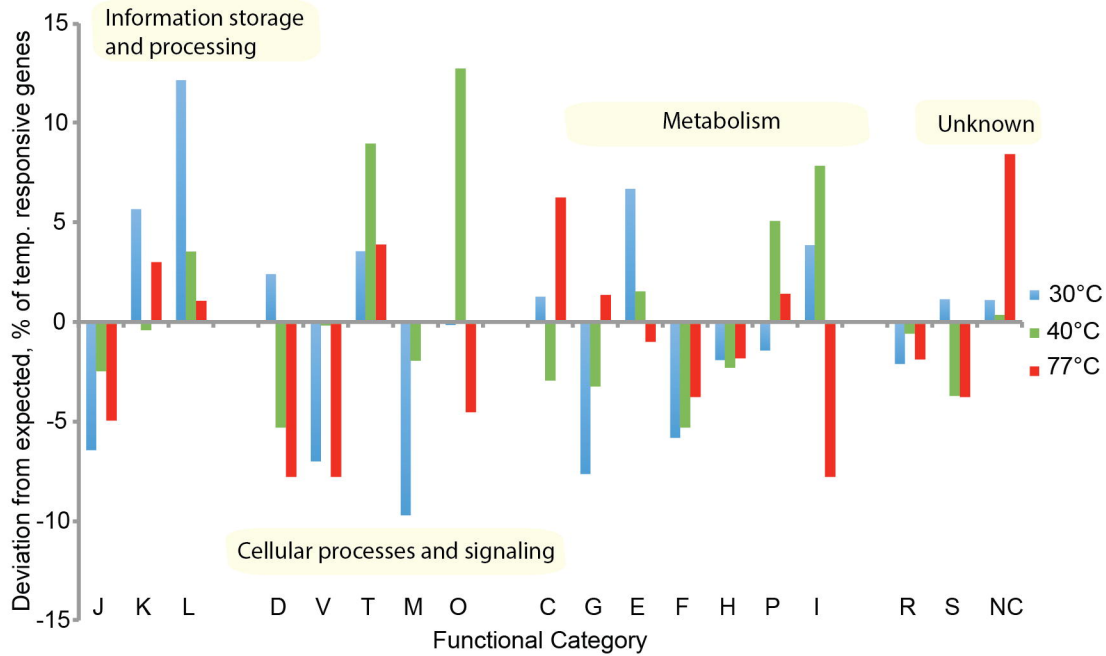

Source: http://www.biorxiv.org/content/10.1101/060053v5.full.pdf
